1 Title:

2 **Germ layer specific regulation of cell polarity and adhesion gives insight into the evolution**  
3 **of mesoderm.**

4

5

6 Authors:

7 Miguel Salinas-Saavedra<sup>1\*</sup>, Amber Q. Rock<sup>1</sup>, and Mark Q Martindale<sup>1†</sup>

8

9

10 Affiliation:

11 <sup>1</sup> The Whitney Laboratory for Marine Bioscience, and the Department of Biology, University of  
12 Florida, 9505 N, Ocean Shore Blvd, St. Augustine, FL 32080-8610, USA

13

14

15

16 \*Corresponding author

17 Email: [mssaavedra@whitney.ufl.edu](mailto:mssaavedra@whitney.ufl.edu) (MS-S)

18 †Lead contact:

19 Email: [mqmartin@whitney.ufl.edu](mailto:mqmartin@whitney.ufl.edu) (MQM)

20

21

22

23

24

25 **Abstract**

26 In triploblastic animals, Par-proteins regulate cell-polarity and adherens junctions of both  
27 ectodermal and endodermal epithelia. But, in embryos of the diploblastic cnidarian *Nematostella*  
28 *vectensis*, Par-proteins are degraded in all cells in the bifunctional gastrodermal epithelium. Using  
29 immunohistochemistry, CRISPR/Cas9 mutagenesis, and overexpression of specific mRNAs, we  
30 describe the functional association between Par-proteins,  $\beta$ -catenin, and snail transcription factor  
31 genes in *N. vectensis* embryos. We demonstrate that the aPKC/Par complex regulates the  
32 localization of  $\beta$ -catenin in the ectoderm by stabilizing its role in cell-adhesion, and that  
33 endomesodermal epithelial cells are organized by a different cell-adhesion system than that of  
34 overlying ectoderm. We also show that ectopic expression of *snail* genes, which are expressed in  
35 mesodermal derivatives in bilaterians, are sufficient to downregulate Par-proteins and translocate  
36  $\beta$ -catenin from the junctions to the cytoplasm in ectodermal cells. These data provide molecular  
37 insight into the evolution of epithelial structure and distinct mesodermal tissue in metazoan  
38 embryos.

39

## 40 Introduction

41 Bilaterian animals comprise more than the 95% of the extant animals on earth and exhibit  
42 enormous body plan diversity (M. Q. Martindale & Lee, 2013). One of the most important  
43 morphological features in bilaterian evolution is the emergence of the mesoderm, an embryological  
44 tissue that gives rise important cell types such as muscle, blood, cartilage, bone, and kidneys in  
45 the space between ectoderm and endoderm. The emergence of mesoderm clearly contributed to  
46 the explosion of biological diversity throughout evolution (M. Martindale, 2005; M. Q. Martindale &  
47 Lee, 2013). Cnidarians (e.g., sea anemones, corals, hydroids, and “jellyfish”) are the sister group  
48 to bilaterians, and despite their surprisingly complex genomes (Putnam et al., 2007), do not  
49 possess a distinct mesodermal tissue layer. Instead, the gastrodermal lining to their gut cavity  
50 consists of a bifunctional endomesodermal epithelium with molecular characteristics of both  
51 bilaterian endodermal and myoepithelial mesodermal cells (Jahnel, Walzl, & Technau, 2014; M. Q.  
52 Martindale & Lee, 2013; M. Q. Martindale, Pang, & Finnerty, 2004; Technau & Scholz, 2003). For  
53 example, *brachyury* and *snail*, among other genes, contribute to the specification of the  
54 endomesodermal fates in both bilaterian and cnidarian embryos (Magie, Daly, & Martindale, 2007;  
55 M. Q. Martindale et al., 2004; Servetnick et al., 2017; Technau & Scholz, 2003; Yasuoka, Shinzato,  
56 & Satoh, 2016). Yet in bilaterians, mesodermal cells segregate from an embryonic  
57 endomesodermal precursor to form both endoderm and a third tissue layer (mesoderm) not  
58 present in the embryos of diploblastic cnidarians (Davidson et al., 2002; Maduro & Rothman, 2002;  
59 M. Q. Martindale et al., 2004; Rodaway & Patient, 2001; Solnica-Krezel & Sepich, 2012). How  
60 mesodermal cells originally segregated from an ancestral endomesodermal epithelium during  
61 animal evolution is still unclear (M. Martindale, 2005; M. Q. Martindale & Lee, 2013; Technau &  
62 Scholz, 2003), particularly because virtually all of the genes required for mesoderm formation are  
63 present in cnidarian genomes (Baumgarten et al., 2015; Chapman et al., 2010; Putnam et al.,  
64 2007; Shinzato et al., 2011). During the last decade, several studies have described molecular and  
65 cellular characteristics related to the segregation of mesoderm during bilaterian development  
66 (Darras, Gerhart, Terasaki, Kirschner, & Lowe, 2011; Keller, Davidson, & Shook, 2003; Schäfer,  
67 Narasimha, Vogelsang, & Leptin, 2014; Solnica-Krezel & Sepich, 2012). Here we investigate the

68 cellular basis of morphogenesis during embryogenesis of the “diploblastic” sea anemone,  
69 *Nematostella vectensis*.  
70  
71 In most bilaterian embryos described to date, after a series of synchronous and stereotyped  
72 cleavage divisions, maternal determinants induce the localization of nuclear  $\beta$ -catenin to  
73 blastomeres derived from the vegetal pole (M. Q. Martindale & Lee, 2013). Hence, gastrulation and  
74 the specification of endomesodermal fates is restricted to the vegetal pole. In these species,  
75 *brachyury* is expressed at the border of the blastopore and *snail* is expressed in the prospective  
76 mesodermal tissues (Technau & Scholz, 2003). The formation of mesoderm involves a variety of  
77 cellular processes including the downregulation of E-cadherin, loss of apicobasal cell polarity, and  
78 in some cases, the induction of epithelial-to-mesenchymal transition (EMT) (Acloque, Adams,  
79 Fishwick, Bronner-Fraser, & Nieto, 2009; Lim & Thiery, 2012; Schäfer et al., 2014; Solnica-Krezel  
80 & Sepich, 2012).  
81  
82 Embryos of the cnidarian starlet sea anemone *N. vectensis* develop without a stereotyped  
83 cleavage pattern but cell fates become organized along the embryonic animal-vegetal axis  
84 (Fritzenwanker, Genikhovich, Kraus, & Technau, 2007; Salinas-Saavedra, Stephenson, Dunn, &  
85 Martindale, 2015). During blastula formation, embryonic cells of *N. vectensis* form a single hollow  
86 epithelial layer. Epithelial cells of the animal pole, characterized by the nuclear localization of *Nv* $\beta$ -  
87 catenin prior to gastrulation (P. N. Lee, Kumburegama, Marlow, Martindale, & Wikramanayake,  
88 2007; Wikramanayake et al., 2003), invaginate by apical constriction to form the endomesodermal  
89 epithelium (Magie et al., 2007; Tamulonis et al., 2011). The expression of *Nvbrachyury* around the  
90 presumptive border of the blastopore and *Nvsnail* genes in the presumptive endomesodermal  
91 gastrodermis of *N. vectensis* embryos occurs even before the morphological process of  
92 gastrulation begins (Röttinger, Dahlin, & Martindale, 2012; Scholz & Technau, 2003).  
93  
94 Interestingly, the components of the intracellular polarity Par system (*Nva*PKC, *NvPar*-6, *NvPar*-3,  
95 *NvPar*-1, and *NvLgl*), which show a highly polarized bilaterian-like subcellular distribution  
96 throughout all epithelial cells at the blastula stage in *N. vectensis* (Salinas-Saavedra et al., 2015),

97 are specifically degraded and down-regulated from the endomesoderm during the gastrulation  
98 process (Figure 1A). We have previously suggested that the expression of bilaterian “mesodermal  
99 genes” (e.g. *Nvsnail*) might induce the loss of apicobasal cell-polarity indicated by the absence of  
100 the components of the Par system in the endomesoderm of *N. vectensis* embryos (Salinas-  
101 Saavedra et al., 2015). Recent studies in *N. vectensis* and bilaterians have provided information  
102 that supports this hypothesis. For example, it has been shown that *snail* is necessary and sufficient  
103 to downregulate Par3 in *Drosophila* mesoderm, inducing the disassembly of junctional complexes  
104 in these tissues (Weng & Wieschaus, 2016, 2017). In addition, we have shown that *Nvbrachyury*  
105 regulates epithelial apicobasal polarity of *N. vectensis* embryos, suggesting some aspects of  
106 epithelial cell polarity are highly conserved (Servetnick et al., 2017). Together, this evidence  
107 suggests a plausible cellular and molecular mechanism for the segregation of a distinct cell layer in  
108 bilaterian evolution from an ancestral bifunctional endomesodermal tissue. Thus, in this study we  
109 describe the functional association between the components of the Par system, apical junctions,  
110 epithelial integrity, and the nuclearization of *Nvβ*-catenin in a cnidarian embryo. In addition, we  
111 demonstrate that the endomesoderm in *N. vectensis* is organized by different junctional complexes  
112 that confer different functional properties to this tissue than the overlying ectoderm. And finally, we  
113 investigate the putative interactions between the components of the Par system, the canonical Wnt  
114 signaling pathway, and *snail* gene expression, giving insights on the evolution of the mesoderm  
115 and EMT.

116

## 117 **Results**

118

### 119 **Ectodermal and endomesodermal epithelia are organized by different cell-cell adhesion** 120 **complexes.**

121 Components of the Par system are not present in the cells of endomesodermal epithelium of *N.*  
122 *vectensis* during gastrulation, even though the very same cells express these proteins during the  
123 blastula stage (Salinas-Saavedra et al., 2015) (Figure 1). This absence is consistent with the  
124 absence of apical Adherens Junctions (AJs) in the endomesoderm of *N. vectensis* (Figure S1) and  
125 other cnidarians (Chapman et al., 2010; Ganot et al., 2015; Magie et al., 2007). At polyp stages,

126 neither  $\beta$ -catenin (an AJ-associated protein) (Figure 1B and 1C) nor the Par proteins (Figure S1C)  
127 are detectable in endomesodermal cells of either the gastrodermis or the pharynx. When *N.*  
128 *vectensis* embryos are stained with antibodies to  $\beta$ -catenin (Figure 1) or if *Nv* $\beta$ -catenin::GFP  
129 mRNA is expressed in uncleaved zygotes (Figure S1B), clear localization of  $\beta$ -catenin can be seen  
130 in the cortex of ectodermally derived epithelial cells (Figure 1B, 1C, 1D, 1G, and 1I), but not in  
131 endomesodermal cells (Figure 1B and 1C). In pharyngeal cells that are located between the  
132 epidermis and gastrodermis, *Nv* $\beta$ -catenin (Figure 1B and 1D), *Nv*Par-6 (Figure 1E), and *Nv*Par-1  
133 (Figure 1F) expression begins to disappear, and is localized only in the most apical regions,  
134 indicating that AJs are being disassembled/degraded during the gastrulation process (Figure 1G  
135 and 1H). During later planula stages,  $\beta$ -catenin and the components of the Par system display  
136 scattered patterns in the cytoplasm of a small subset of endomesodermal cells (Figure 1I and 1J).  
137 Even though we do not know the identity of these cells, this expression temporally coincides with  
138 the transient activation of Wnt signaling emanating from the oral pole (Kusserow et al., 2005;  
139 Marlow, Matus, & Martindale, 2013) at those developmental stages. In bilaterians (Acloque et al.,  
140 2009; Lim & Thiery, 2012) and *N. vectensis* (Kusserow et al., 2005; Marlow et al., 2013), the later  
141 activation of Wnt signaling is also associated with neurogenesis, and may cause the observed  
142 changes in protein localization.

143

144 Regardless of this scattered expression, it is clear that cells that undergo gastrulation in *N.*  
145 *vectensis* lose their polarized ectodermal cell-cell adhesion complex and components of the Par  
146 system, including  $\beta$ -catenin, are downregulated from endomesodermal tissues (Figure 1). In  
147 bilaterians, the proper formation of an epithelial paracellular barrier (essential for tissue  
148 homeostasis) depends on the establishment of adhesive complexes between adjacent cells  
149 (Higashi, Arnold, Stephenson, Dinshaw, & Miller, 2016; Jonusaite, Donini, & Kelly, 2015), which  
150 are regulated by the aPKC/Par complex (Ohno, Goulas, & Hirose, 2015). To test if this absence of  
151 protein expression is correlated to differential cell-cell adhesion in the endomesodermal epithelium  
152 of *N. vectensis*, we assessed their role in regulating paracellular movements between ectodermal  
153 and endomesodermal epithelia by using a fluorescent tracer dye penetration assay (Figure  
154 2A)(Higashi et al., 2016). For the purposes of these experiments, in order to avoid unwanted

155 results related to tissue specification, cell proliferation, and cell movements, we used newly  
156 hatched juvenile polyps where the gastrodermis (endomesodermally derived) is fully differentiated.  
157  
158 *N. vectensis* polyps were exposed to media containing 10,000 MW fluorescent dextran (Molecular  
159 Probes, Inc.). When juvenile polyps are incubated in dextran for 5-10 minutes (Figure 2B),  
160 fluorescent dextran solution moves into the gastric cavity and then spreads into the mesoglea  
161 through the gastrodermal epithelium (Figure 2C) but does not enter the mesoglea through the  
162 outer ectodermally-derived epidermis (Figure 2C and 2D). These results suggest that cell-cell  
163 adhesion is differentially regulated between the epidermis and gastrodermis and the  
164 absence/disruption of AJs may compromise Septate Junctions (SJs) in the gastrodermis. Similar  
165 results were obtained in *N. vectensis* polyps when we overexpressed *NvPar-3::mVenus* by  
166 injection of mRNA into uncleaved eggs which is normally expressed in ectodermal but not  
167 endodermal epithelial tissue (Figure 2D and 2E). However, in polyps expressing a dominant  
168 negative version of *NvPar-3::mVenus* (*dnNvPar-3*; microinjected into uncleaved eggs) dye  
169 penetrated between epithelial cells in both the gastrodermis and the outer epidermis (Figure 2D,  
170 2F, and 2G), demonstrating an ancestral role of the aPKC/Par complex in the maintenance of cell-  
171 cell adhesion and the paracellular boundary (SJs) of epithelial cells during animal development.

172

### 173 **The *Nva*PKC/Par complex regulates the formation and maintenance of cell-cell junctions.**

174 Our results suggest that the absence of Par proteins in the endomesoderm is associated with  
175 changes in cell-cell adhesion complexes. Pharmacological treatment of *N. vectensis* embryos with  
176 an aPKC activity inhibitor blocks cytokinesis but not mitosis in cleaving embryos (Figure 3A). In  
177 addition, a dominant negative version of *NvPar-1* (*dnNvPar-1*), that lacks its kinase domain,  
178 localizes only to the cortex of cell-cell contacts (Figure 3B). *dnNvPar-1* can be phosphorylated by  
179 aPKC but cannot phosphorylate the aPKC/Par complex (Böhm, Brinkmann, Drab, Henske, &  
180 Kurzchalia, 1997; Vaccari, Rabouille, & Ephrussi, 2005). Thus, *dnNvPar-1* can localize to the cell  
181 cortex where aPKC is inactive. These results together suggest that the formation of cell-cell  
182 contacts is regulated by the activity of the aPKC/Par complex in *N. vectensis* embryos (Figure 3C).

183

184 We further tested this hypothesis by using genome editing by CRISPR/Cas9 targeting *Nvpar-6* and  
185 *Nvpar-3* genes (Figure 3D). We did not observe any effects on the embryo until 36 hpf at 16°C  
186 (late blastula stage), indicating the activity of maternally loaded proteins up until that stage. When  
187 *NvPar-6* and *NvPar-3* are mutated, the ectodermal epithelium loses its integrity, presenting  
188 changes in thickness (Figure S2B and S3A), and interestingly, the endomesoderm (which does not  
189 express these proteins) generates cells with mesenchymal-like morphotypes that are never  
190 normally seen in this species (Figure 3D). In *Nvpar-6* and *Nvpar-3* mutant embryos, we also  
191 observed the disruption of microtubules and actin cytoskeleton (Figure S3B), and AJs (visualized  
192 with the  $\beta$ -catenin antibody in Figure 3I) that confirms our previous observations of their role in  
193 regulating ectodermal cell polarity. Since we did not observe significant changes in the expression  
194 of germ layer markers when these genes were disrupted (e.g. *Nvbra*, *Nvsnail*, *NvSix3/6*, and  
195 *Nvfz10*; Figure S3E), we believe that only cell adhesion, but not cell specification, was affected by  
196 these experiments. Similar results were obtained when we overexpressed the mRNA encoding for  
197 a dominant negative version *NvPar-6* (dn*NvPar-6*) and *NvPar-3* (dn*NvPar-3*) into *N. vectensis*  
198 eggs (Figure S2 and S4). However, dominant negative effects on the injected embryos were  
199 observed at earlier stages (10-12 hpf) than the CRISPR/Cas9 mutants (zygotic expression)  
200 because the mutant proteins compete with the wild type proteins (maternally loaded). Hence, in  
201 these experiments, embryonic lethality (90%) and cell death were higher.

202

### 203 **The *NvaPKC/Par* complex regulates transepithelial signaling.**

204 One surprising observation from the experiments described above show that the changes  
205 observed in the ectodermal and endodermal epithelium after disrupting *NvPar-6* and *NvPar-3*  
206 (Figure 3) suggests some sort of trans-epithelial regulation of cell-cell adhesion (most likely  
207 involving AJs) because these Par genes are not expressed in the endomesoderm. The polarizing  
208 activity of the aPKC/Par complex in the ectoderm is thus necessary to maintain the integrity of both  
209 ecto- and endodermal epithelia during cellular movements associated with gastrulation.

210

211 To assess whether the observed phenotypes on cell-cell adhesion are related to non-autonomous  
212 cell regulation (trans-epithelial interactions), we repeated the above experiments randomly injecting



213 single blastomeres at 3-4 hpf (8-16 cell-stage) to make mutant clones in an otherwise wild type  
214 background. In these experiments, only the cell-lineage of the injected blastomere would be  
215 affected and would exhibit defective cell-cell adhesion in an otherwise undisturbed wild-type  
216 background. If endomesodermal cells derived from an injected blastomere display  
217 fibroblast/mesenchymal cell morphology, it would indicate that the organization of the  
218 endomesodermal epithelium is not dependent on the ectoderm but, rather, an intrinsic cell-  
219 autonomous activity of the aPKC/Par complex (Figure 3E). Our results show that only ectodermal-  
220 but not endomesodermal-lineages are affected by these mutations (Figure 3F and S3D).  
221 Presumptive ectodermal cells derived from an injected blastomere fail to maintain AJs (and  
222 potentially SJs) and the resulting clone of epithelial cells loses its structural integrity inducing cell  
223 extrusion. In contrast, presumptive endomesodermal cells derived from an injected blastomere  
224 develop into a normal endomesodermal epithelium (Figure 3F). Our results compliment the work of  
225 (Kirillova et al., 2018) and demonstrate that the proper cell-cell adhesion of the ectodermal layer  
226 somehow regulates trans-epithelially the integrity of the endomesodermal layer. This regulation  
227 may maintain the tension between cells during invagination at gastrula stages, or, in conjunction  
228 with the extracellular matrix (ECM) and basal cues, it may influence signaling patterns necessary  
229 to organize epithelial layers during *N. vectensis* embryogenesis.

230

231 **Interaction between the *Nva*PKC/Par complex and the canonical Wnt signaling pathway.**

232 ***Nva*PKC/Par complex regulates  $\beta$ -catenin localization.**

233 In bilaterians, AJs recruit members of the aPKC/Par complex and the direct interaction between  
234 Par-3 and aPKC/Par-6 is required for the maintenance and maturation of AJs (Ohno et al., 2015;  
235 Ragkousi, Marr, McKinney, Ellington, & Gibson, 2017). AJs are characterized by the binding  
236 between cadherins and  $\beta$ -catenin: cadherins sequester  $\beta$ -catenin from the cytoplasm to the cortex,  
237 making it unavailable for nuclear signaling and endomesoderm specification (Kumburegama,  
238 Wijesena, Xu, & Wikramanayake, 2011; Wikramanayake et al., 2003). Therefore, using  $\beta$ -catenin  
239 as a marker for AJs, we separately co-injected *Nv*Par-3::mVenus or a mutated dn*Nv*Par-  
240 3::mVenus, with *Nv* $\beta$ -catenin::RFP into uncleaved zygotes. We observed cortical co-localization of  
241 *Nv*Par-3 and *Nv* $\beta$ -catenin at the cell boundaries in the ectodermal epithelium of embryos co-

242 injected with *NvPar-3::mVenus* and *Nvβ-catenin::RFP* (Figure 4A). However, in embryos co-  
243 injected with *Nvβ-catenin::RFP* and *dnNvPar-3::mVenus*, we observed an alteration of the sub-  
244 cellular expression of *Nvβ-catenin::RFP* in all cells due to the translocation of β-catenin from the  
245 cortical AJs into cell nuclei (Figure 4A).

246 In addition, results from *N. vectensis* embryos treated with 5μm 1-azakenpaullone (AZ; an inhibitor  
247 of GSK-3β and a canonical Wnt agonist) suggest that GSK-3β stabilizes AJs of epithelial cells in *N.*  
248 *vectensis* embryos (Figure S5). We observed an expansion of the expression domain of Par-6  
249 (Figure S5) and a stabilization of AJs (labeled with β-catenin in Figure S5) in endomesodermal  
250 cells of treated embryos, which was never observed in control embryos.

251

252 Interestingly, the association between the nuclearization of β-catenin (canonical Wnt signaling  
253 pathway) and the Par system has been poorly studied. Two studies, one in *Drosophila* (Sun et al.,  
254 2001) and the another in *Xenopus* (Ossipova, Dhawan, Sokol, & Green, 2005) embryos, have  
255 shown by immunoblotting that the kinase Par-1 is associated with Dishevelled protein and might  
256 act as a positive regulator of Wnt signaling. Here, we show *in vivo* embryonic evidence suggesting  
257 that *NvPar-3* (whose cortical localization is normally inhibited by Par-1) recruits *Nvβ-catenin* protein  
258 and stabilizes its localization at the apico-lateral cortex of ectodermal cells through the formation of  
259 AJs. Furthermore, the putative disassembly of the aPKC/Par complex induced by *dnNvPar-3*  
260 overexpression, induces the nuclearization of *Nvβ-catenin* protein (Figure 4A) due to its cytosolic  
261 availability caused by AJs disruption. Strikingly, we also observed the extrusion of individual cells  
262 from the ectodermal epithelium of *dnNvPar-3* treated-embryos (Figure 4C) and single injected-  
263 blastomere CRISPR/Cas9 *NvPar-3* knock-out (Figure 4D). This suggests that these treatments  
264 induce EMT-like processes, not observed under control conditions (Figure 4C).

265

266 Thus, our data suggest that preexisting mechanisms downstream to the induction of EMT may  
267 have been redeployed to segregate layers during the evolution to bilaterians. Bringing the question  
268 whether or not endomesodermal genes would induce similar effects when they are expressed in *N.*  
269 *vectensis* embryos.

270 We have recently showed that *Nvbrachyury* regulates apicobasal polarity of epithelial cells in *N.*  
271 *vectensis* embryos (Servetnick et al., 2017). We, therefore, examined the role of *Nvsnail* genes on  
272 the localization of  $\beta$ -catenin, components of the Par system, and the stabilization of AJs. Our  
273 hypothesis is that expression of *N. vectensis snail* genes would destabilize AJs and induce the  
274 nuclearization of  $\beta$ -catenin in ectodermal epithelial cells.

275

### 276 ***Nvsnail* genes induce the translocation of *Nv* $\beta$ -catenin from AJs to the cytoplasm.**

277 *N. vectensis* has two *snail* genes, *Nvsnail-A* and *Nvsnail-B*, which are both expressed in the  
278 endomesodermal plate prior to and throughout the gastrulation process, and which define the  
279 boundary between gastrodermis and ectodermal pharynx (Amiel et al., 2017; Magie et al., 2007;  
280 Röttinger et al., 2012). To determine the role of *Nvsnail* genes on  $\beta$ -catenin nuclearization, we co-  
281 injected the mRNA of *NvSnail-A::mCherry*, *NvSnail-B::mCherry*, and *Nv* $\beta$ -catenin::*GFP* into  
282 uncleaved eggs. The overexpression of both proteins *NvSnail-A::mCherry* and *NvSnail-B::mCherry*  
283 together induce the ectopic translocation of *Nv* $\beta$ -catenin::*GFP* to the nuclei of ectodermal cells  
284 (Figure 5A). This treatment also delocalizes *NvPar-3* from the cell cortex when both  
285 *NvSnail::mCherry* proteins are co-expressed with *NvPar-3::mVenus* (Figure 5B).

286

287 To determine the role of *Nvsnail* genes on cell adhesion/epithelial polarity, we randomly injected  
288 single blastomeres at the 8-32 cell-stage with mRNA from both *NvSnail-A::mCherry* and *NvSnail-*  
289 *B::mCherry* together. The fluorescent dextran that was co-injected with the mRNAs could be used  
290 to detect the clones where the over-expression of the co-injected mRNAs occurred in a “wild-type”  
291 background (Figure 5D). Similar to the *Nvpar-3* knock-out (Figure 3F), the expression of *Nvsnail*  
292 genes is sufficient to induce the degradation of Par proteins and AJs ( $\beta$ -catenin) from the ectoderm  
293 and disrupts its epithelial integrity; however, nuclear  $\beta$ -catenin was not observed under these  
294 treatments (Figure 5D). Thus, nuclear *Nv* $\beta$ -catenin::*GFP* observed *in vivo* when we overexpressed  
295 *NvSnail* proteins (Figure 5A) is a consequence of the high cytosolic availability generated by its  
296 ectopic overexpression and release from AJs.

297 Interestingly, not every ectodermal cell was affected by these treatments even though all of the  
298 cells expressed the injected mRNAs (Figure 5A, 5E, and S6). This patched pattern suggests that

299 the response to *Nvsnail* over-expression is spatially regulated. These results suggest that the role  
300 of *Nvsnail* genes on AJs and apicobasal cell polarity is constrained to the site of gastrulation in *N.*  
301 *vectensis* embryos under natural conditions, and that these genes may be required for gastrulation  
302 movements. Therefore, we predicted that  $\beta$ -catenin (AJs) and Par proteins will be retained in the  
303 cells of the *N. vectensis* endomesodermal plate if both *Nvsnail* genes are disrupted.

304

305 ***Nvsnail* genes downregulate apicobasal cell polarity and AJs in the endomesodermal**  
306 **epithelium of *N. vectensis* embryos.**

307 The *snail* genes temporally down-regulate E-cadherin during mesoderm segregation and EMT in  
308 bilaterian animals (Lim & Thiery, 2012). As we have shown here, as well as in previous studies  
309 (Magie et al., 2007; Magie & Martindale, 2008), the cells comprising the endomesodermal plate  
310 lose their cell-cell adhesion during gastrulation in *N. vectensis* embryos. It may be possible that  
311 temporal regulation of endomesodermal patterning might act upon the AJs. Our data suggest that  
312 once gastrulation is complete and the pharynx forms, components of the Par system and the  $\beta$ -  
313 catenin components of the AJs are degraded from both the cortex and cytoplasm of  
314 endomesodermal cells (Figure 1 and S1). Hence, it could be possible that *Nvbrachyury* induces the  
315 disruption of apicobasal polarity (Servetnick et al., 2017), remnant AJs maintain the  
316 endomesodermal-plate cells together, and *Nvsnail* genes degrades and prevents the reassembly  
317 of AJs in the endomesoderm of *N. vectensis*.

318

319 To address these issues, we used CRISPR/Cas9 knock-out of *Nvsnail-A* and *Nvsnail-B* genes  
320 together to inhibit zygotic function of these genes and investigate their role on the temporal  
321 regulation of AJs and cell polarity. In CRISPR/Cas9 mutants, the endomesodermal plate forms but  
322 it does not migrate further than its first invagination during gastrulation (Figure 5F). Furthermore,  
323 AJs (labeled with  $\beta$ -catenin) and apical Par proteins (labeled with anti*NvPar-6* and anti*NvaPKC*)  
324 are retained at the apical cortex of the cells of the endomesodermal plate (Figure 5F and S6).  
325 Surprisingly, *NvPar-1* and *NvLgl* were not detected in those cells (Figure 5F), suggesting that the  
326 degradation of these basolateral proteins precede or do not depend on the activity of the *Nvsnail*  
327 genes. This suggests that *Nvsnail* regulates apical cell-polarity, AJs turnover, and the migration

328 ('zippering') but not the invagination of the endomesodermal plate during gastrulation of *N.*  
329 *vectensis* embryos. Interestingly, the invagination of the endomesodermal plate (controlled by the  
330 Wnt/PCP pathway) is uncoupled from its specification in *N. vectensis* embryos (Kumburegama et  
331 al., 2011; N. M. Wijesena, 2012), which is consistent with our observations.

332

### 333 **Discussion**

#### 334 **AJs are down-regulated in mesoderm and neural crest of bilaterian animals.**

335 The segregation of different germ layers during embryogenesis of many bilaterian animals is  
336 carried out by similar cellular mechanisms. EMT is a shared mechanism utilized by mesoderm,  
337 neural crest cell (NCC), and tumorigenesis to delaminate cells in bilaterian animals (triploblastic  
338 animals). During EMT, the nuclearization of  $\beta$ -catenin induces the expression of 'endomesodermal'  
339 genes like *brachyury* and *snail* (Acloque et al., 2009). The expression of these genes  
340 downregulates epithelial cadherins, disrupts apicobasal polarity (mediated by the aPKC/Par  
341 complex), disassembles AJs, and induces changes in cytoskeleton organization (Acloque et al.,  
342 2009; Lim & Thiery, 2012). A rearrangement of the actin-myosin cytoskeleton induces apical  
343 constriction of cells (generating a bottle-like shape), which detach from the epithelial sheet, break  
344 down the basal membrane, and invade a specific tissue as mesenchymal cells (Acloque et al.,  
345 2009; Lim & Thiery, 2012; Ohsawa, Vaughen, & Igaki, 2018).

346

347 Interestingly, mesoderm formation, tumorigenesis, and EMT have never been described as natural  
348 processes during *N. vectensis* (a diploblastic animal) embryogenesis. During *N. vectensis*  
349 gastrulation (Magie et al., 2007; Tamulonis et al., 2011), cells around the edge of the blastopore at  
350 the animal pole (which expresses *Nvbrachyury*) acquire a bottle-like shape by apical constriction,  
351 leading to epithelial buckling and the invagination of presumptive endomesoderm (which expresses  
352 *Nvsnail*). However, throughout this process the endomesoderm remains as a monolayer of  
353 epithelial cells and individual mesenchymal cells never detach and invade the blastocoel.  
354 We have shown that by disrupting the aPKC/Par complex (apicobasal cell-polarity) in *N. vectensis*  
355 (Figure 3 and 4), we are able to convert cells from the endomesodermal epithelium into  
356 mesenchymal-like cells, translocate *Nv* $\beta$ -catenin (Figure 4A), and emulate EMT-like processes

357 (apical constriction and individual cell-detachments) in the ectodermal epithelium of *N. vectensis*  
358 treated-embryos (Figure 4C and 4D). These results demonstrate that the cnidarian *N. vectensis*  
359 possesses mechanisms necessary to segregate individual germ layers (e.g. mesoderm and NCC)  
360 described in bilaterians; however, they do not do it.

361

362 Our working hypothesis is that the *N. vectensis* embryo is composed of two independent  
363 morphogenetic modules that are integrated and organized by the pharynx (Figure 5G). The first  
364 observation is that the ectoderm, whose apicobasal polarity (and thus, AJs and epithelial integrity)  
365 is regulated by *Nvbrachyury* that promotes ectodermal epithelial morphogenesis and pharynx  
366 formation (Servetnick et al., 2017), and the second module is generated by endomesodermal  
367 differentiation and cell-movements that are regulated by *Nvsnail* genes. This is supported by the  
368 expression *Nvbrachyury* (Servetnick et al., 2017)<sup>9</sup> in *Nvsnail* knock-out embryos (Figure S7), and  
369 *Nvsnail* knock-out phenotypes where ectodermal pharynx develops normally but no clear  
370 endomesoderm is formed (Figure S6). Additional work is required to elucidate any differences in  
371 function between *Nvsnail-A* and *Nvsnail-B* genes, however, both modules are specified by nuclear  
372  $\beta$ -catenin (Röttinger et al., 2012), suggesting that the nuclear  $\beta$ -catenin (maternal) shift from the  
373 animal pole in cnidarians to the vegetal pole in bilaterians is mechanistically plausible and sufficient  
374 to re-specify the site of gastrulation and germ-layers along the animal-vegetal axis during  
375 Metazoan evolution (P. N. Lee et al., 2007; M. Q. Martindale & Lee, 2013).

376

### 377 **The dual identity and collective migration of the endomesodermal cells.**

378 Bilaterian-EMT has been a focus of study for decades as a mechanism to segregate different cell  
379 layers involved in a variety of different normal and pathological biological processes (Nieto, Huang,  
380 Jackson, & Thiery, 2016; Ohsawa et al., 2018). This process appears to depend on the fine  
381 regulation of *snail* expression levels and their temporal activity. For example, during NCC  
382 migration, cells display 'partial-EMT' where cells remain attached to several neighboring cells but  
383 their apicobasal polarity and AJs are down-regulated, allowing collective-cell migration (J. M. Lee,  
384 Dedhar, Kalluri, & Thompson, 2006; Nieto et al., 2016; Ribeiro & Paredes, 2014; Theveneau &  
385 Mayor, 2013; Weng & Wieschaus, 2017). Our data suggest that 'partial-EMT' may be the

386 mechanism by which the endomesodermal epithelium migrates into the blastocoel in *N. vectensis*  
387 embryos during normal gastrulation (Figure 6). In this scenario, upstream factors that regulate *snail*  
388 transcription may be critical for this process.

389

390 In bilaterian animals, there are many other pathways in addition to the canonical Wnt pathway that  
391 activate *snail* transcription and induce the disruption of AJs and apicobasal cell polarity. For  
392 example, TGF $\beta$ , BMP, NANOS, FGF, and MEK/ERK/ERG take on roles during the specification of  
393 mesoderm, NCC migration, tumorigenesis, and other EMT-related processes (Barrallo-Gimeno &  
394 Nieto, 2005; Lim & Thiery, 2012; Nieto et al., 2016). Concordantly in *N. vectensis* embryos, cells of  
395 the pharyngeal and endomesodermal tissues express components of all these pathways (Amiel et  
396 al., 2017; Extavour, Pang, Matus, & Martindale, 2005; Matus, Thomsen, & Martindale, 2006, 2007;  
397 Röttinger et al., 2012; N. Wijesena, Simmons, & Martindale, 2017) that may modify their cellular  
398 characteristics. For example, one cadherin (*NvCDH2* (Clarke, Miller, Lowe, Weis, & Nelson,  
399 2016): 1g244010), and kinases that modify tubulin and histones are differentially regulated  
400 between ecto- and endomesodermal epithelium (N. Wijesena et al., 2017).

401

402 In conclusion, *N. vectensis* has both up and downstream cellular and molecular mechanisms  
403 associated with EMT described in bilaterians. However, *N. vectensis* does not segregate a distinct  
404 mesodermal germ layer nor display EMT under natural conditions. In bilaterians, this mechanism  
405 must have evolved to segregate mesodermal cells from the endoderm to retain the tight cell-cell  
406 junctions required in endodermal epithelia. Interestingly, mesoderm segregation via EMT in  
407 *Drosophila* takes place after epithelial folding in response to *snail* expression. In these embryos,  
408 contractile myosin enhances the localization of AJs and Par-3 in the presumptive mesoderm and  
409 prevents their downregulation by Snail, thus delaying EMT (Weng & Wieschaus, 2016, 2017).  
410 Furthermore, the overexpression of Snail in *Drosophila* embryos is sufficient to disassemble  
411 ectodermal-AJs, but mesodermal-AJs are maintained by actomyosin contraction that antagonize  
412 Snail effects (Weng & Wieschaus, 2016, 2017). Our results suggest a similar mechanism since  
413 *Nvsnail* overexpression in endomesodermal lineages (Figure S6) is not sufficient to segregate cells  
414 and the endomesoderm remains as an epithelium. However, unlike *Drosophila*, Par proteins and



415 AJs are not enhanced but degraded during the gastrulation of *N. vectensis* (Figure 1). As it is  
416 discussed in (Weng & Wieschaus, 2017), not only the degradation but also the turnover of AJs and  
417 Par proteins in adjacent epithelia is essential for EMT-mediated germ layer segregation in different  
418 animals. The dual identity of *N. vectensis* endomesoderm is characterized by the continuous  
419 expression of *Nvsnail* genes (M. Q. Martindale et al., 2004) that repress the turnover of AJs and  
420 may play a role in inhibiting EMT from occurring (Figure 5).

421

422 Interestingly, components of the Wnt/PCP pathway are expressed only in the endomesoderm  
423 (Kumburegama et al., 2011; N. M. Wijesena, 2012), while components of the Par system are  
424 expressed only in the ectoderm (Salinas-Saavedra et al., 2015). It could be that NvSnail degrades  
425 AJs and inhibits their re-assembly in the endomesoderm, but the activation of contractile myosin by  
426 the Wnt/PCP pathway maintains the endomesodermal cells together in *N. vectensis* embryos.  
427 Hence in bilaterians, a mechanism (most likely downstream of Snail) that connects the  
428 cytoskeleton with cell-polarity may have evolved to tighten cell-cell adhesion in the endoderm and  
429 allow EMT.

430 To elucidate this, further comparative research and funding are needed to understand the cellular  
431 mechanisms that evolve to segregate mesoderm and control epithelial cell polarity at the base of  
432 the metazoan tree. For example, ctenophores segregate a mesodermal cell population during  
433 embryogenesis but do not have the genes that encode for all cell-cell adhesion complexes and  
434 specify for mesoderm in bilaterians (Figure S8) (Ganot et al., 2015; Ryan et al., 2013). Thus, there  
435 is much to be learned by the comparative study of cell biology.

436

## 437 **Material and methods**

### 438 **Culture and spawning of *Nematostella vectensis*.**

439 Spawning, gamete preparation, fertilization and embryo culturing of *N. vectensis*  
440 (RRID:SCR\_005153) embryos was performed as previously described (Hand & Uhlinger, 1992;  
441 Layden, Röttinger, Wolenski, Gilmore, & Martindale, 2013; Röttinger et al., 2012; Wolenski,  
442 Layden, Martindale, Gilmore, & Finnerty, 2013). Adult *N. vectensis* were cultivated at the Whitney  
443 Laboratory for Marine Bioscience of the University of Florida (USA). Males and females were kept



444 in separate glass bowls (250 ml) in 1/3x seawater (salinity: 12pp) reared in dark at 16°C. Animals  
445 were fed freshly hatched *Artemia* 3 times a week and macerated oyster the day before spawning.  
446 Spawning was induced by incubating the adults under an eight-hour light cycle at 25°C the night  
447 before the experiment. Distinct groups of animals were spawned once every 2 weeks. Oocytes and  
448 sperm were collected separately and fertilized *in vitro* by adding sperm to egg masses for 25  
449 minutes. The jelly mass surrounding the fertilized eggs was removed by incubating the eggs in 4%  
450 L-Cysteine (in 1/3x seawater; pH 7.4) for 15-17 minutes and then washed 3 times with 1/3x  
451 seawater. De-jellied eggs were kept in glass dishes (to prevent sticking) in filtered 1/3 seawater at  
452 16°C until the desired stage.

453

#### 454 **Immunohistochemistry**

455 All immunohistochemistry experiments were carried out using the previous protocol for *N.*  
456 *vectensis* (Salinas-Saavedra et al., 2015) with a slight modification in the glutaraldehyde  
457 concentration to allow better antibody penetration. Embryos were fixed on a rocking platform at  
458 room temperature in two consecutive steps. Embryos of different stages were fixed for no longer  
459 than 3 minutes in fresh Fix-1 (100mM HEPES pH 6.9; 0.05M EGTA; 5mM MgSO<sub>4</sub>; 200mM NaCl;  
460 1x PBS; 3.7% Formaldehyde; 0.2% Glutaraldehyde; 0.5% Triton X-100; and pure water). Then,  
461 Fix-1 was removed and replace with fresh Fix-2 (100mM HEPES pH 6.9; 0.05M EGTA; 5mM  
462 MgSO<sub>4</sub>; 200mM NaCl; 1x PBS; 3.7% Formaldehyde; 0.05% Glutaraldehyde; 0.5% Triton X-100;  
463 and pure water). Embryos were incubated in Fix-2 for 1 hour. Fixed embryos were rinsed at least  
464 five times in PBT (PBS buffer plus 0.1% BSA and 0.2% Triton X-100) for a total period of 3 hours.  
465 PBT was replaced with 5% normal goat serum (NGS; diluted in PBT) and fixed embryos were  
466 blocked for 1 to 2 hours at room temperature with gentle rocking. Primary antibodies were diluted  
467 in 5% NGS to desired concentration. Blocking solution was removed and replaced with primary  
468 antibodies diluted in NGS. All antibodies incubations were conducted over night on a rocker at 4°C.  
469 After incubation of the primary antibodies, samples were washed at least five times with PBT for a  
470 total period of 3 hours. Secondary antibodies were then applied (1:250 in 5% NGS) and samples  
471 were left on a rocker overnight at 4°C. Samples were then washed with PBT and left on a rocker at  
472 room temperature for an hour. To visualize F-actin, samples were incubated then for 1.5 hours in

473 Phalloidin (Invitrogen, Inc. Cat. # A12379) diluted 1:200 in PBT. Samples were then washed once  
474 with PBT and incubated with DAPI (0.1µg/µl in PBT; Invitrogen, Inc. Cat. # D1306) for 1 hour to  
475 allow nuclear visualization. Stained samples were rinsed again in PBS two times and dehydrated  
476 quickly into isopropanol using the gradient 50%, 75%, 90%, and 100%, and then mounted in  
477 Murray's mounting media (MMM; 1:2 benzyl benzoate:benzyl alcohol) for visualization. Note that  
478 MMM may wash DAPI out of your sample. For single blastomere microinjection experiments, after  
479 Phalloidin staining, samples were incubated with Texas Red Streptavidin (1:200 in PBT from  
480 1mg/ml stock solution; Vector labs, Inc. Cat.# SA-5006. RRID:AB\_2336754) for 1 hour to visualize  
481 the injected dextran. We scored more than 1,000 embryos per each antibody staining and confocal  
482 imaged more than 50 embryos at each stage.

483

484 The primary antibodies and concentrations used were: mouse anti-alpha tubulin (1:500; Sigma-  
485 Aldrich, Inc. Cat.# T9026. RRID:AB\_477593), rabbit anti-β-catenin (1:300; Sigma-Aldrich, Inc.  
486 Cat.# C2206. RRID:AB\_476831), mouse anti-histone H1 (1:300; F152.C25.WJJ, Millipore, Inc.  
487 RRID:AB\_10845941).

488 Rabbit anti-*Nva*PKC, rabbit anti-*NvLgl*, rabbit anti-*NvPar-1*, and rabbit anti-*NvPar-6* antibodies are  
489 custom made high affinity-purified peptide antibodies that were previously raised by the same  
490 company (Bethyl Inc.). All these four antibodies are specific to *N. vectensis* proteins (Salinas-  
491 Saavedra et al., 2015) and were diluted 1:100.

492 Secondary antibodies are listed in Supplementary file 1.

493

#### 494 **Fluorescent tracer dye penetration assay**

495 Primary polyps were incubated and mounted in 1/3 sea water with fluorescent dextran solution (0.5  
496 mg/ml). For uninjected embryos we used Dextran, Alexa Fluor® 555 (Molecular Probes, INC. Cat.#  
497 D34679). For injected embryos, expressing fluorescent proteins, we used Dextran, Alexa Fluor®  
498 647 (Molecular Probes, INC. Cat.# D22914). Animals were observed within 10 minutes of  
499 incubation. 15 animals were recorded per treatment. For better visualization of the dextran solution  
500 inside the gastric cavity as shown in Figure 2B, we delivered additional dextran solution by  
501 microinjecting dye through the polyp's mouth. For the rest of the experiments, we mainly focused in

502 the ectodermal permeability and we let the polyps to eat the solution by themselves as grown  
503 babies.

504

### 505 **mRNA microinjections**

506 The coding region for each gene of interest was PCR-amplified and cloned into pSPE3-mVenus or  
507 pSPE3-mCherry using the Gateway system (Roure et al., 2007). Eggs were injected directly after  
508 fertilization as previously described (Layden et al., 2013; Salinas-Saavedra et al., 2015) with the  
509 mRNA encoding one or more proteins fused in frame with reporter fluorescent protein (N-terminal  
510 tag) using final concentrations of 450 ng/ $\mu$ l for each gene. Fluorescent dextran was also co-  
511 injected to visualize the embryos. For single blastomere microinjections, we raised the embryos  
512 until 8-16 cell stages (3-4 hpf) and co-injected the mRNA solution with Biotinylated Dextran Amine-  
513 Texas Red (10  $\mu$ g/ $\mu$ l; Vector labs, Inc. Cat.# SP-1140. RRID:AB\_2336249). Live embryos were  
514 kept at 16°C and visualized after the mRNA of the FP was translated into protein (2-3 hours). To  
515 avoid lethality, lower mRNA concentrations of the mutant proteins (250 ng/ $\mu$ l) were used to image  
516 the specimens for Figures 2 and 4, and Movie S1. Live embryos were mounted in 1/3 sea water for  
517 visualization. Images were documented at different stages from 3-96 hrs. post fertilization. We  
518 injected and recorded more than 500 embryos for each injected protein and confocal imaged  
519 approximately 20 specimens for each stage for detailed analysis of phenotypes *in vivo*. We  
520 repeated each experiment at least five times obtaining similar results for each case. The  
521 fluorescent dextran and primers for the cloned genes are listed in Supplementary file 1.

522

### 523 **CRISPR/Cas9 knock-outs**

524 To target our gene of interest, we used synthetic guide RNAs (sgRNA; Synthego, Inc.) and  
525 followed the instructions obtained from the manufacturer to form the RNP complex with Cas9  
526 (Cas9 plus sgRNAs). Target sites, off-target sites, and CFD scores were identified and sgRNA  
527 were designed using CRISPRscan (Doench et al., 2014; Moreno-Mateos et al., 2015). We  
528 delivered the RNP complex by microinjection as previously described (Ikmi, McKinney, Delventhal,  
529 & Gibson, 2014; Servetnick et al., 2017; N. Wijesena et al., 2017). Lyophilized Cas9 (PNA Bio.,  
530 Inc. Cat.# CP01) was reconstituted in nuclease-free water with 20% glycerol to a final

531 concentration of 2µg/µl. Reconstituted Cas9 was aliquoted for single use and stored at -80°C.  
532 Embryos were injected, as described for mRNA microinjections, with a mixture (12.5µl) containing  
533 sgRNAs (80 ng/µl of each sgRNA), Cas9 (3 µg), and Alexa Fluor 488-dextran (0.2 µg/µl; Molecular  
534 Probes, Inc. Cat.# D22910). Cas9 and sgRNA guides only controls were injected alongside each  
535 round of experiments. sgRNA guides controls are only shown in figures as Cas9 had no  
536 significant effects. 3 sgRNA were used to knock out *Nvpar-3*, 3 sgRNA were used to knock out  
537 *Nvpar-6*, 6 sgRNA were used to knock out *Nvsnail-A*, and 6 sgRNA were used to knock out  
538 *Nvsnail-B*. Single-embryo genomic DNA was analyzed as previously described (Servetnick et al.,  
539 2017). Gene expression was confirmed by *in situ* hybridization. We injected and recorded more  
540 than 1000 embryos for each treatment. We repeated each experiment at least six times obtaining  
541 similar results for each case. sgRNAs' sequences and PCR primers flanking the targeted region  
542 are listed in Supplementary file 1.

543

#### 544 ***In situ* hybridization**

545 *In situ* hybridization was carried out following a previously published protocol for *N. vectensis*  
546 (Wolenski et al., 2013). Animals were fixed in ice-cold 4% paraformaldehyde with 0.2%  
547 glutaraldehyde in 1/3x seawater for 2 min, followed by 4% paraformaldehyde in PBTw for 1 hour at  
548 4°C. Digoxigenin (DIG)-labeled probes, previously described (Röttinger et al., 2012; Salinas-  
549 Saavedra et al., 2015), were hybridized at 63°C for 2 days and developed with the enzymatic  
550 reaction of NBT/BCIP as substrate for the alkaline phosphatase conjugated anti-DIG antibody (  
551 Roche, Inc. Cat.#11093274910. RRID:AB\_514497). Samples were developed until gene  
552 expression was visible as a purple precipitate.

553

#### 554 **Drug treatment**

555 We incubated *N. vectensis* embryos in 20µM of aPKC pseudosubstrate inhibitor (Protein kinase Cζ  
556 pseudosubstrate, myristoyl trifluoroacetate salt, Sigma, Cat.#P1614) from 0 to 4 hpf. Controls and  
557 1-azakenpaullone (AZ; Sigma, Cat.#A3734) drug treatment of *N. vectensis* embryos was  
558 performed as previously described (Leclère, Bause, Sinigaglia, Steger, & Rentzsch, 2016;

559 Röttinger et al., 2012). Embryos were developed in 5µm AZ from 3 to 76 hpf. Controls were  
560 incubated in 0.08% DMSO.

561

### 562 **Imaging of *N. vectensis* embryos**

563 Images of live and fixed embryos were taken using a confocal Zeiss LSM 710 microscope using a  
564 Zeiss C-Apochromat 40x water immersion objective (N.A. 1.20). Pinhole settings varied between  
565 1.2-1.4 A.U. according to the experiment. The same settings were used for each individual  
566 experiment to compare control and experimental conditions. Results from *in situ* hybridization  
567 studies were imaged using a Zeiss Imager.M2 with a Zeiss 425 HRc color digital camera run by  
568 Zeiss Zen 2012 software. Z-stack images were processed using Imaris 7.6.4 (Bitplane Inc.)  
569 software for three-dimensional reconstructions and FIJI for single slice and movies. Final figures  
570 were assembled using Adobe Illustrator and Adobe Photoshop.

571

### 572 **Acknowledgments**

573 We thank Leslie S. Babonis for TEM data in Figure S1, A. Wikramanayake for *Nvβ*-catenin  
574 expression constructs, and C. Magie and E. Röttinger for *Nvsnail-A* expression constructs. We  
575 thank E. Seaver, C.E. Schnitzler, and the members of Martindale's lab for helpful discussion. We  
576 also thank the *NSF-IOS 1239422- Broadening participation of underrepresented groups in*  
577 *Developmental Biology*" and NSF REU (DBI-1156528) programs for AQR. This research was  
578 supported by the NIH GM093116, NASA 16-EXO16\_2-0041, NSF IOS-1755364, and Synthego  
579 grants to MQM.

580

### 581 **Author Contributions**

582 MS-S., and MQM. designed research and analyzed data. MS-S. performed research with help of  
583 AQR and MQM. MS-S., and MQM. wrote the manuscript with help of AQR. All authors read and  
584 approved the final manuscript.

585

### 586 **Declaration of Interests**

587 The authors declare no competing interests.

## 588 Bibliography

- 589 Acloque, H., Adams, M. S., Fishwick, K., Bronner-Fraser, M., & Nieto, M. A. (2009). Epithelial-  
590 mesenchymal transitions: the importance of changing cell state in development and disease.  
591 *Journal of Clinical Investigation*, 119(6), 1438-1449. doi:10.1172/JCI38019DS1
- 592 Amiel, A. R., Johnston, H., Chock, T., Dahlin, P., Iglesias, M., Layden, M., . . . Martindale, M. Q.  
593 (2017). A bipolar role of the transcription factor ERG for cnidarian germ layer formation and  
594 apical domain patterning. *Developmental Biology*, 430(2), 346-361.  
595 doi:10.1016/j.ydbio.2017.08.015
- 596 Barrallo-Gimeno, A., & Nieto, M. A. (2005). The Snail genes as inducers of cell movement and  
597 survival: implications in development and cancer. *Development (Cambridge, England)*,  
598 132(14), 3151-3161. doi:10.1242/dev.01907
- 599 Baumgarten, S., Simakov, O., Esherick, L. Y., Liew, Y. J., Lehnert, E. M., Michell, C. T., . . .  
600 Voolstra, C. R. (2015). The genome of *Aiptasia*, a sea anemone model for coral symbiosis.  
601 *Proceedings of the National Academy of Sciences*, 112(38), 11893-11898.  
602 doi:10.1073/pnas.1513318112
- 603 Böhm, H., Brinkmann, V., Drab, M., Henske, A., & Kurzchalia, T. V. (1997). Mammalian  
604 homologues of *C. elegans* PAR-1 are asymmetrically localized in epithelial cells and may  
605 influence their polarity. *Current Biology*, 7(8), 603-606.
- 606 Chapman, J. A., Kirkness, E. F., Simakov, O., Hampson, S. E., Mitros, T., Weinmaier, T., . . .  
607 Steele, R. E. (2010). The dynamic genome of *Hydra*. *Nature*, 464(7288), 592-596.  
608 doi:10.1038/nature08830
- 609 Clarke, D. N., Miller, P. W., Lowe, C. J., Weis, W. I., & Nelson, W. J. (2016). Characterization of  
610 the Cadherin-Catenin Complex of the Sea Anemone *Nematostella vectensis* and  
611 Implications for the Evolution of Metazoan Cell-Cell Adhesion. *Molecular Biology and  
612 Evolution*, 33(8), 2016-2029. doi:10.1093/molbev/msw084
- 613 Darras, S., Gerhart, J., Terasaki, M., Kirschner, M., & Lowe, C. J. (2011).  $\beta$ -catenin specifies the  
614 endomesoderm and defines the posterior organizer of the hemichordate *Saccoglossus*  
615 *kowalevskii*. *Development (Cambridge, England)*, 138(5), 959-970. doi:10.1242/dev.059493
- 616 Davidson, E. H., Rast, J. P., Oliveri, P., Ransick, A., Calestani, C., Yuh, C.-H., . . . Bolouri, H.  
617 (2002). A Provisional Regulatory Gene Network for Specification of Endomesoderm in the  
618 Sea Urchin Embryo. *Developmental Biology*, 246(1), 162-190. doi:10.1006/dbio.2002.0635
- 619 Doench, J. G., Hartenian, E., Graham, D. B., Tothova, Z., Hegde, M., Smith, I., . . . Root, D. E.  
620 (2014). Rational design of highly active sgRNAs for CRISPR-Cas9-mediated  
621 gene inactivation. *Nature Biotechnology*, 1-8. doi:10.1038/nbt.3026
- 622 Extavour, C. G., Pang, K., Matus, D. Q., & Martindale, M. Q. (2005). *vasa* and *nanos* expression  
623 patterns in a sea anemone and the evolution of bilaterian germ cell specification  
624 mechanisms. *Evolution & Development*, 7(3), 201-215. doi:10.1111/j.1525-  
625 142X.2005.05023.x
- 626 Fritzenwanker, J. H., Genikhovich, G., Kraus, Y., & Technau, U. (2007). Early development and  
627 axis specification in the sea anemone *Nematostella vectensis*. *Developmental Biology*,  
628 310(2), 264-279. doi:10.1016/j.ydbio.2007.07.029
- 629 Ganot, P., Zoccola, D., Tambutté, E., Voolstra, C. R., Aranda, M., Allemand, D., & Tambutté, S.  
630 (2015). Structural molecular components of septate junctions in cnidarians point to the  
631 origin of epithelial junctions in eukaryotes. *Molecular Biology and Evolution*, 32(1), 44-62.  
632 doi:10.1093/molbev/msu265
- 633 Hand, C., & Uhlinger, K. R. (1992). The Culture, Sexual and Asexual Reproduction, and Growth of  
634 the Sea Anemone *Nematostella vectensis*. *Biological Bulletin*, 182(2), 169-176.  
635 doi:10.2307/1542110?ref=no-x-route:d1c5362229b0c8c9d53b48cd9862c77c
- 636 Higashi, T., Arnold, T. R., Stephenson, R. E., Dinshaw, K. M., & Miller, A. L. (2016). Maintenance  
637 of the Epithelial Barrier and Remodeling of Cell-Cell Junctions during Cytokinesis. *Current  
638 Biology*, 1-31. doi:10.1016/j.cub.2016.05.036
- 639 Ikmi, A., McKinney, S. A., Delventhal, K. M., & Gibson, M. C. (2014). TALEN and CRISPR/Cas9-  
640 mediated genome editing in the early-branching metazoan *Nematostella vectensis*. *Nature  
641 communications*, 5, 5486. doi:10.1038/ncomms6486



- 642 Jahnel, S. M., Walzl, M., & Technau, U. (2014). Development and epithelial organisation of muscle  
643 cells in the sea anemone *Nematostella vectensis*. *Frontiers in zoology*, 11(1), 44-15.  
644 doi:10.1186/1742-9994-11-44
- 645 Jonusaite, S., Donini, A., & Kelly, S. P. (2015). Occluding junctions of invertebrate epithelia.  
646 *Journal of Comparative Physiology B*, 186(1), 17-43. doi:10.1007/s00360-015-0937-1
- 647 Keller, R., Davidson, L. A., & Shook, D. R. (2003). How we are shaped: the biomechanics of  
648 gastrulation. *Differentiation; research in biological diversity*, 71(3), 171-205.  
649 doi:10.1046/j.1432-0436.2003.710301.x
- 650 Kirillova, A., Genikhovich, G., Pukhlyakova, E., Demilly, A., Kraus, Y., & Technau, U. (2018).  
651 Germ-layer commitment and axis formation in sea anemone embryonic cell aggregates.  
652 *Proceedings of the National Academy of Sciences of the United States of America*, 115(8),  
653 1813-1818. doi:10.1073/pnas.1711516115
- 654 Kumburegama, S., Wijesena, N., Xu, R., & Wikramanayake, A. H. (2011). Strabismus-mediated  
655 primary archenteron invagination is uncoupled from Wnt/ $\beta$ -catenin-dependent endoderm  
656 cell fate specification in *Nematostella vectensis* (Anthozoa, Cnidaria): Implications for the  
657 evolution of gastrulation. *EvoDevo*, 2(1), 2. doi:10.1186/2041-9139-2-2
- 658 Kusserow, A., Pang, K., Sturm, C., Hrouda, M., Lentfer, J., Schmidt, H. A., . . . Holstein, T. W.  
659 (2005). Unexpected complexity of the Wnt gene family in a sea anemone. *Nature*,  
660 433(7022), 156-160. doi:10.1038/nature03158
- 661 Layden, M. J., Röttinger, E., Wolenski, F. S., Gilmore, T. D., & Martindale, M. Q. (2013).  
662 Microinjection of mRNA or morpholinos for reverse genetic analysis in the starlet sea  
663 anemone, *Nematostella vectensis*. *Nature Protocols*, 8(5), 924-934.  
664 doi:10.1038/nprot.2013.009
- 665 Leclère, L., Bause, M., Sinigaglia, C., Steger, J., & Rentzsch, F. (2016). Development of the aboral  
666 domain in *Nematostella* requires  $\beta$ -catenin and the opposing activities of Six3/6 and  
667 Frizzled5/8. *Development (Cambridge, England)*, 143(10), 1766-1777.  
668 doi:10.1242/dev.120931
- 669 Lee, J. M., Dedhar, S., Kalluri, R., & Thompson, E. W. (2006). The epithelial–mesenchymal  
670 transition: new insights in signaling, development, and disease. *The Journal of Cell Biology*,  
671 172(7), 973-981. doi:10.1083/jcb.200601018
- 672 Lee, P. N., Kumburegama, S., Marlow, H. Q., Martindale, M. Q., & Wikramanayake, A. H. (2007).  
673 Asymmetric developmental potential along the animal-vegetal axis in the anthozoan  
674 cnidarian, *Nematostella vectensis*, is mediated by Dishevelled. *Developmental Biology*,  
675 310(1), 169-186. doi:10.1016/j.ydbio.2007.05.040
- 676 Lim, J., & Thiery, J. P. (2012). Epithelial-mesenchymal transitions: insights from development.  
677 *Development (Cambridge, England)*, 139(19), 3471-3486. doi:10.1242/dev.071209
- 678 Maduro, M. F., & Rothman, J. H. (2002). Making Worm Guts: The Gene Regulatory Network of the  
679 *Caenorhabditis elegans* Endoderm. *Developmental Biology*, 246(1), 68-85.  
680 doi:10.1006/dbio.2002.0655
- 681 Magie, C. R., Daly, M., & Martindale, M. Q. (2007). Gastrulation in the cnidarian *Nematostella*  
682 *vectensis* occurs via invagination not ingression. *Developmental Biology*, 305(2), 483-497.  
683 doi:10.1016/j.ydbio.2007.02.044
- 684 Magie, C. R., & Martindale, M. Q. (2008). Cell-cell adhesion in the cnidaria: insights into the  
685 evolution of tissue morphogenesis. *The Biological Bulletin*, 214(3), 218-232.
- 686 Marlow, H., Matus, D. Q., & Martindale, M. Q. (2013). Ectopic activation of the canonical wnt  
687 signaling pathway affects ectodermal patterning along the primary axis during larval  
688 development in the anthozoan *Nematostella vectensis*. *Developmental Biology*, 380(2),  
689 324-334. doi:10.1016/j.ydbio.2013.05.022
- 690 Martindale, M. (2005). The evolution of metazoan axial properties. *Nature reviews Genetics*, 6(12),  
691 917-927.
- 692 Martindale, M. Q., & Lee, P. N. (2013). The Development of Form: Causes and Consequences of  
693 Developmental Reprogramming Associated with Rapid Body Plan Evolution in the  
694 Bilaterian Radiation. *Biological Theory*, 8(3), 253-264. doi:10.1007/s13752-013-0117-z
- 695 Martindale, M. Q., Pang, K., & Finnerty, J. R. (2004). Investigating the origins of triploblasty:  
696 'mesodermal' gene expression in a diploblastic animal, the sea anemone *Nematostella*  
697 *vectensis* (phylum, Cnidaria; class, Anthozoa). *Development (Cambridge, England)*,  
698 131(10), 2463-2474. doi:10.1242/dev.01119

- 699 Matus, D. Q., Thomsen, G. H., & Martindale, M. Q. (2006). Dorso/ventral genes are asymmetrically  
700 expressed and involved in germ-layer demarcation during cnidarian gastrulation. *Current*  
701 *Biology*, 16(5), 499-505. doi:10.1016/j.cub.2006.01.052
- 702 Matus, D. Q., Thomsen, G. H., & Martindale, M. Q. (2007). FGF signaling in gastrulation and  
703 neural development in *Nematostella vectensis*, an anthozoan cnidarian. *Development*  
704 *Genes and Evolution*, 217(2), 137-148. doi:10.1007/s00427-006-0122-3
- 705 Moreno-Mateos, M. A., Vejnar, C. E., Beaudoin, J.-D., Fernandez, J. P., Mis, E. K., Khokha, M. K.,  
706 & Giraldez, A. J. (2015). CRISPRscan: designing highly efficient sgRNAs for CRISPR-Cas9  
707 targeting in vivo. *Nature Methods*, 12(10), 982-988. doi:10.1038/nmeth.3543
- 708 Nieto, M. A., Huang, R. Y.-J., Jackson, R. A., & Thiery, J. P. (2016). EMT: 2016. *Cell*, 166(1), 21-  
709 45. doi:10.1016/j.cell.2016.06.028
- 710 Ohno, S., Goulas, S., & Hirose, T. (2015). The PAR3-aPKC-PAR6 Complex. In K. Ebnet (Ed.), *Cell*  
711 *Polarity 1: Biological Role and Basic Mechanisms* (pp. 3-23). Cham: Springer International  
712 Publishing.
- 713 Ohsawa, S., Vaughan, J., & Igaki, T. (2018). Cell Extrusion: A Stress-Responsive Force for Good  
714 or Evil in Epithelial Homeostasis. *Developmental Cell*, 44(3), 284-296.  
715 doi:10.1016/j.devcel.2018.01.009
- 716 Ossipova, O., Dhawan, S., Sokol, S., & Green, J. B. A. (2005). Distinct PAR-1 proteins function in  
717 different branches of Wnt signaling during vertebrate development. *Developmental Cell*,  
718 8(6), 829-841. doi:10.1016/j.devcel.2005.04.011
- 719 Putnam, N. H., Srivastava, M., Hellsten, U., Dirks, B., Chapman, J., Salamov, A., . . . Rokhsar, D.  
720 S. (2007). Sea anemone genome reveals ancestral eumetazoan gene repertoire and  
721 genomic organization. *Sup. Science*, 317(5834), 86-94. doi:10.1126/science.1139158
- 722 Ragkousi, K., Marr, K., McKinney, S., Ellington, L., & Gibson, M. C. (2017). Cell-Cycle-Coupled  
723 Oscillations in Apical Polarity and Intercellular Contact Maintain Order in Embryonic  
724 Epithelia. *Current Biology*, 1-19. doi:10.1016/j.cub.2017.03.064
- 725 Ribeiro, A. S., & Paredes, J. (2014). P-Cadherin Linking Breast Cancer Stem Cells and Invasion: A  
726 Promising Marker to Identify an ‘Intermediate/Metastable’ EMT State. *Frontiers*  
727 *in oncology*, 4, 371. doi:10.3389/fonc.2014.00371
- 728 Rodaway, A., & Patient, R. (2001). Mesendoderm. an ancient germ layer? *Cell*, 105(2), 169-172.
- 729 Röttinger, E., Dahlin, P., & Martindale, M. Q. (2012). A framework for the establishment of a  
730 cnidarian gene regulatory network for ‘endomesoderm’ specification: the inputs of  $\beta$ -  
731 catenin/TCF signaling. *PLoS genetics*, 8(12), e1003164. doi:10.1371/journal.pgen.1003164
- 732 Roure, A., Rothbacher, U., Robin, F., Kalmar, E., Ferone, G., Lamy, C., . . . Lemaire, P. (2007). A  
733 multicassette Gateway vector set for high throughput and comparative analyses in ciona  
734 and vertebrate embryos. *PLoS One*, 2(9), e916. doi:10.1371/journal.pone.0000916.s004
- 735 Ryan, J. F., Pang, K., Schnitzler, C. E., Nguyen, A. D., Moreland, R. T., Simmons, D. K., . . .  
736 Baxevanis, A. D. (2013). The Genome of the Ctenophore *Mnemiopsis leidyi* and Its  
737 Implications for Cell Type Evolution. *Science*, 342(6164), 1242592-1242592.  
738 doi:10.1126/science.1242592
- 739 Salinas-Saavedra, M., Stephenson, T. Q., Dunn, C. W., & Martindale, M. Q. (2015). Par system  
740 components are asymmetrically localized in ectodermal epithelia, but not during early  
741 development in the sea anemone *Nematostella vectensis*. *EvoDevo*, 6(1).  
742 doi:10.1186/s13227-015-0014-6
- 743 Schäfer, G., Narasimha, M., Vogelsang, E., & Leptin, M. (2014). Cadherin switching during the  
744 formation and differentiation of the *Drosophila* mesoderm - implications for epithelial-to-  
745 mesenchymal transitions. *Journal of Cell Science*, 127(Pt 7), 1511-1522.  
746 doi:10.1242/jcs.139485
- 747 Scholz, C. B., & Technau, U. (2003). The ancestral role of Brachyury: expression of *NemBra1* in  
748 the basal cnidarian *Nematostella vectensis* (Anthozoa). *Archiv für Entwicklungsmechanik*  
749 *der Organismen*, 212(12), 563-570. doi:10.1007/s00427-002-0272-x
- 750 Servetnick, M. D., Steinworth, B., Babonis, L. S., Simmons, D., Salinas-Saavedra, M., &  
751 Martindale, M. Q. (2017). Cas9-mediated excision of *Nematostella* brachyury disrupts  
752 endoderm development, pharynx formation and oral-aboral patterning. *Development*  
753 (*Cambridge, England*), 144(16), 2951-2960. doi:10.1242/dev.145839



- 754 Shinzato, C., Shoguchi, E., Kawashima, T., Hamada, M., Hisata, K., Tanaka, M., . . . Satoh, N.  
755 (2011). Using the *Acropora digitifera* genome to understand coral responses to  
756 environmental change. *Nature*, *476*(7360), 320-323. doi:10.1038/nature10249
- 757 Solnica-Krezel, L., & Sepich, D. S. (2012). Gastrulation: making and shaping germ layers. *Annual*  
758 *review of cell and developmental biology*, *28*, 687-717. doi:10.1146/annurev-cellbio-  
759 092910-154043
- 760 Sun, T. Q., Lu, B., Feng, J. J., Reinhard, C., Jan, Y. N., Fantl, W. J., & Williams, L. T. (2001). PAR-  
761 1 is a Dishevelled-associated kinase and a positive regulator of Wnt signalling. *Nature Cell*  
762 *Biology*, *3*(7), 628-636. doi:10.1038/35083016
- 763 Tamulonis, C., Postma, M., Marlow, H. Q., Magie, C. R., de Jong, J., & Kaandorp, J. (2011). A cell-  
764 based model of *Nematostella vectensis* gastrulation including bottle cell formation,  
765 invagination and zippering. *Developmental Biology*, *351*(1), 217-228.  
766 doi:10.1016/j.ydbio.2010.10.017
- 767 Technau, U., & Scholz, C. B. (2003). Origin and evolution of endoderm and mesoderm. *The*  
768 *International Journal of Developmental Biology*, *47*(7-8), 531-539.
- 769 Theveneau, E., & Mayor, R. (2013). Collective cell migration of epithelial and mesenchymal cells.  
770 *Cellular and molecular life sciences : CMLS*, *70*(19), 3481-3492. doi:10.1007/s00018-012-  
771 1251-7
- 772 Vaccari, T., Rabouille, C., & Ephrussi, A. (2005). The *Drosophila* PAR-1 spacer domain is required  
773 for lateral membrane association and for polarization of follicular epithelial cells. *Current*  
774 *Biology*, *15*(3), 255-261. doi:10.1016/j.cub.2005.01.033
- 775 Weng, M., & Wieschaus, E. (2016). Myosin-dependent remodeling of adherens junctions protects  
776 junctions from Snail-dependent disassembly. *The Journal of Cell Biology*, *212*(2), 219-229.  
777 doi:10.1083/jcb.201508056
- 778 Weng, M., & Wieschaus, E. (2017). Polarity protein Par3/Bazooka follows myosin-dependent  
779 junction repositioning. *Developmental Biology*, *422*(2), 125-134.  
780 doi:10.1016/j.ydbio.2017.01.001
- 781 Wijesena, N., Simmons, D. K., & Martindale, M. Q. (2017). Antagonistic BMP-cWNT signaling in  
782 the cnidarian *Nematostella vectensis* reveals insight into the evolution of mesoderm.  
783 *Proceedings of the National Academy of Sciences of the United States of America*,  
784 *114*(28), E5608-E5615. doi:10.1073/pnas.1701607114
- 785 Wijesena, N. M. (2012). *Wnt Signaling in the Cnidarian Nematostella vectensis: Insights into the*  
786 *Evolution of Gastrulation*. (Doctoral Thesis), University of Miami, Retrieved from  
787 [http://scholarlyrepository.miami.edu/cgi/viewcontent.cgi?article=1922&context=oa\\_dis](http://scholarlyrepository.miami.edu/cgi/viewcontent.cgi?article=1922&context=oa_dis)  
788 [sertations](#)
- 789 Wikramanayake, A. H., Hong, M., Lee, P. N., Pang, K., Byrum, C. A., Bince, J. M., . . . Martindale,  
790 M. Q. (2003). An ancient role for nuclear catenin in the evolution of axial polarity and germ  
791 layer segregation. *Nature*, *426*, 446-450.
- 792 Wolenski, F. S., Layden, M. J., Martindale, M. Q., Gilmore, T. D., & Finnerty, J. R. (2013).  
793 Characterizing the spatiotemporal expression of RNAs and proteins in the starlet sea  
794 anemone, *Nematostella vectensis*. *Nature Protocols*, *8*(5), 900-915.  
795 doi:10.1038/nprot.2013.014
- 796 Yasuoka, Y., Shinzato, C., & Satoh, N. (2016). The Mesoderm-Forming Gene *brachyury* Regulates  
797 Ectoderm-Endoderm Demarcation in the Coral *Acropora digitifera*. *Current Biology*, 1-21.  
798 doi:10.1016/j.cub.2016.08.011  
799

800

801

802 **Figure 1. Components of the Par system and  $\beta$ -catenin are downregulated from the *N.***

803 ***vectensis* endomesoderm during gastrulation.** A-F. Confocal images of immunofluorescent

804 staining (IFS) of lateral views of gastrulation embryos (animal pole up). The \* marks the site of

805 gastrulation in all cases. Samples are counterstained with Phalloidin (Phall) staining (white) to  
806 show cell boundaries, DAPI to visualize cell nuclei (blue), and Tubulin antibody (Tub) staining is  
807 shown as counterstain (green). All images are a single optical section from a z-stack confocal  
808 series. All scale bars, 20  $\mu\text{m}$ .

809 (A) Summary diagram depicting the localization of  $\beta$ -catenin and Par proteins at the observed  
810 stages. Pale boxes denote changes observed in the endomesoderm.

811 (B) IFS for  $\beta$ -catenin (magenta) in primary polyps. High magnification images from boxed region  
812 (endomesoderm, Endo) are shown on the bottom. Arrows indicate the absence of  $\beta$ -catenin  
813 expression in the endomesoderm. Arrowheads indicate the  $\beta$ -catenin expression in the  
814 ectodermal pharynx (EP). Star indicates the endomesodermal pharynx (EnP). Histone antibody  
815 (Hist) staining is shown as counterstain to show the penetrability in the fixed tissue. See also  
816 Figure S1.

817 (C) IFS for  $\beta$ -catenin (magenta) in the ecto and endomesoderm (arrow) of primary polyps.

818 (D) IFS for  $\beta$ -catenin (magenta) at 24 hpf shows localization to the apical domain where adherens  
819 junctions reside in all cells of the blastula. High magnification images from boxed region  
820 (prospective endomesoderm) are shown on the right.

821 (E) IFS for *NvPar-6* (magenta) at 24 hpf showing the same sub-cellular localization as  $\beta$ -catenin  
822 (A). High magnification images from boxed region in (A) (prospective endomesoderm) are  
823 shown on the right. Merged image shown on upper left.

824 (F) IFS for *NvPar-1* at 24 hpf shows a complementary basolateral expression. High magnification  
825 images from boxed region (prospective endomesoderm) are shown on the right.

826 (G) IFS for  $\beta$ -catenin at 30 hpf shows the loss of expression of  $\beta$ -catenin (magenta) in invaginating  
827 endomesoderm (box). The arrow (D-F) marks the boundary between ectoderm and  
828 invaginating endomesoderm. High magnification images from boxed region (prospective  
829 endomesoderm) are shown on the right.

830 (H) IFS for *NvPar-6* and *NvPar-1*(magenta) at 30 hpf show that all Par proteins are down regulated  
831 at the site of gastrulation. IFS for *NvPar-6* shows an even earlier down regulation than  $\beta$ -  
832 catenin (D). High magnification images from boxed region (prospective endomesoderm) are  
833 shown on the right. Merged image shown on upper left.

834 (I) Oral view of IFS for  $\beta$ -catenin (magenta) at 96 hpf showing apical localization in overlying  
835 ectoderm, but absence in endomesodermal tissues. The two bottom panels show high  
836 magnifications of the endomesoderm region (image inverted). Arrowheads indicate the  
837 localization of  $\beta$ -catenin expression (black) in some scattered endomesodermal cells.  
838 (J) Lateral view of IFS for *NvaPKC* and *NvLgl* (magenta) at 96 hpf showing loss of expression in  
839 invaginating epithelial cells. The four bottom panels show high magnifications of the  
840 endomesoderm region (image inverted). Arrowheads indicate the localization of *NvaPKC* and  
841 *NvLgl* proteins (black) in some scattered endomesodermal cells.

842

843 **Figure 2. The aPKC/Par complex maintains Adherens Junctions (AJs) of ectodermal**  
844 **epithelial cells.**

845 Arrows indicate the direction of the flow: from gastric cavity (gc) to mesoglea (white) and from  
846 external media (ex) to ectoderm (blue). Dashed lines indicate the base of the epidermis. All images  
847 are single optical section from the z-stack confocal series. See also Figure S2 for *dnNvPar-3*  
848 description. Scale bars, 20  $\mu$ m.

849 (A) Diagram depicting the hypothesis that when the aPKC/Par complex is functional (top row), AJs  
850 are present (blue stripes) and a paracellular epithelial barrier is formed. When aPKC/Par  
851 complex is not functional (bottom row), AJs are disrupted, the epithelial barrier is perturbed,  
852 and the extracellular solution moves paracellularly into the mesoglea.

853 (B) Penetration assay of wild type (uninjected) primary polyps at low magnification showing the  
854 movement of 10,000MW fluorescent dextran. Top row, no dextran. Bottom row, dextran  
855 (yellow) in the gc moves in to the mesoglea through paracellular spaces between gastrodermal  
856 cells (arrows).

857 (C) High magnification images from box shown in (B). \*: mesoglea (purple band) that separates the  
858 ectoderm (ECT, dashed line) from gastrodermis (GDR). Note the dye moving between cells  
859 from the gc media (arrows)

860 (D) Low magnification images comparing polyps expressing *NvPar-3::mVenus* and a dominant  
861 negative version of *NvPar-3* (*dnNvPar-3::mVenus*) expressing-embryos. Dextran media (DM;  
862 extracellular) is pseudo-colored yellow. Dextran (red) was co-injected with mRNAs to label the

863 cells and differentiate intracellular regions. mVenus channel was omitted for better  
864 visualization. Lower concentrations of dnNvPar-3 were injected to preserve endomesodermal  
865 tissues. Note that the dextran media was found between the cells labeled in red.  
866 (E) High magnification images from (F) boxed region in (E). Purple band depicts Mesoglea.  
867 (F) High magnification images from (G) boxed region in (E).  
868 (G) High magnification images from (H) boxed region in (E).  
869 \*: Paracellular spaces of both, the epidermis (blue) and gastrodermis (white).  
870  
871 **Figure 3. Ectodermal NvaPKC/Par complex polarity regulates the epithelial integrity of both**  
872 **ecto- and endomesoderm.**  
873 (A) IFS for NvaPKC at 4 hpf showing that the aPKC inhibitor (Sigma P1614) blocks cytokinesis but  
874 not cell cycle.  
875 (B) In vivo expression of dnNvPar-1 shows precocious localization to zones of cell contact during  
876 cleavage stages, well before wild-type NvPar genes do. See also Figure S2A.  
877 (C) Diagram depicting the suggested the working hypothesis.  
878 (D) CRISPR/Cas9 knock-out for NvPar-6 and NvPar-3 at 48 hpf. Controls show no effect on  
879 gastrulation. Tubulin (Tub), Phalloidin (Phall), and DAPI are used as counterstains.  
880 CRISPR/Cas9 mutants: tubulin stained low magnification of CRISPR phenotype. High  
881 magnification images from boxed region shows mesenchymal-like cells. Arrowheads indicate  
882 filopodia-like structures. Number of cases observed for each gene are shown. See also Figure  
883 S2, S3, and S4.  
884 (E) Diagram depicts the hypothesis addressed in (I). The cell lineage derived from a single  
885 injected-blastomere is in green.  
886 (F) IFS for  $\beta$ -catenin ( $\beta$ -cat), NvPar-6, NvaPKC, and NvPar-1 in single injected-blastomere  
887 CRISPR/Cas9 NvPar-3 knock-outs at 40 hpf. Streptavidin-Biotin TxRed Dextran (Dex) is  
888 shown in green. Arrowheads indicate the absence of the protein and disrupted epithelium.  
889 Arrows indicate bottle-like shape cells. \* indicate the orientation of the site of gastrulation. See  
890 also Figure S3D.

891 Morphology is shown by DAPI, Tub, and Phall IFS. Except for 3B and 3D, all images are single  
892 optical sections from the z-stack confocal series. (B) and (D) are 3D reconstructions from a z-stack  
893 confocal series. All scale bars, 20  $\mu$ m.

894

895 **Figure 4. *NvaPKC/Par* complex regulates  $\beta$ -catenin localization and cell attachment.**

896 (A) In vivo co-localization of *NvPar-3*venus co-injected with *Nv* $\beta$ -cateninRFP, and dn*NvPar-3*venus  
897 co-injected with *Nv* $\beta$ -cateninRFP. Arrowheads indicate junctions (AJs). Arrows indicate nuclear  
898  $\beta$ -catenin.

899 (B) Diagram of the suggested interpretation for A.

900 (C) In vivo time series of ectodermal epithelial layers of embryos injected with *NvPar-3*venus and  
901 dn*NvPar-3*venus mRNA demonstrating epithelial delamination in the absence of functional  
902 *NvPar3*. *Lifeact::mTq2* mRNA was co-injected to visualize cell boundaries. Pink arrows indicate  
903 the absence cell detachments. A subset of cells was artificially colored. The purple cell  
904 detaches from the epithelium and the red arrow indicates a second cell  
905 detachment. See also Movie S1.

906 (D) IFS of an embryo in which a single blastomere was injected with *NvPar-3* guide RNAs and  
907 Cas9 and green dextran. Red arrowheads indicate the apical constriction and delamination of  
908 ectodermal cells in the mutated clone of cells. Note the different layers of nuclei stained with  
909 DAPI. Asterisks indicate the site of gastrulation.

910 (E) Diagram of the suggested interpretation for D.

911 All images are 3D reconstructions from a z-stack confocal series. All scale bars, 20  $\mu$ m.

912

913 **Figure 5. *Nvsnail* genes downregulate AJs and *NvaPKC/Par* polarity allowing**  
914 **endomesodermal migration.**

915 (A) in vivo localization of *Nv* $\beta$ -cateninGFP co-injected with both *NvSnail-A::mCherry* and *NvSnail-*  
916 *B::mCherry* mRNA together in zygotes at 40 hpf. White arrowheads indicate AJs. Patched  
917 patterns of cytosolic and nuclear  $\beta$ -catenin (Blue arrowheads) were observed.

918 (B) In vivo localization of *NvPar-3::mVenus* co-injected with both *NvSnail-A::mCherry* and *NvSnail-*  
919 *B::mCherry* mRNA together at 40 hpf. Patched patterns of AJs (White arrowheads) were  
920 observed.

921 (C) Diagram depicts the suggested interpretation for A and B.

922 (D) IFS for  $\beta$ -catenin ( $\beta$ -cat), *NvPar-6*, *NvaPKC*, and *NvPar-1* in embryos at 40 hpf where *NvSnail-*  
923 *A::mCherry* and *NvSnail-B::mCherry* mRNA were overexpressed together into a single  
924 ectodermal blastomere lineage (followed by green Streptavidin-TxRed Dextran (Dex).  
925 Arrowheads indicate the absence of the protein, cytosolic  $\beta$ -cat, and disrupted epithelium.  
926 Arrows indicate bottle-like shape cells. \*site of gastrulation.

927 (E) IFS for  $\beta$ -cat in embryos at 40 hpf where *NvSnail-A::mCherry* and *NvSnail-B::mCherry* mRNA  
928 were overexpressed together into a single blastomere lineage and no affects were observed.  
929 See also Figure S7.

930 (F) Embryo wide CRISPR/Cas9 knock-out for both *Nvsnail-A* and *Nvsnail-B* at 40 hpf showing that  
931 AJs form in presumptive endomesodermal region similar to ectodermal cells. High  
932 magnification images from boxed region (endomesodermal plate) are shown on the right.  
933 Arrowheads indicate protein localization.

934 (G) Graphical summary of the observed results with previous published data (Servetnick et al.,  
935 2017).

936 Morphology is shown by DAPI, Tub, and Phall IFS. Except from 6A and 6B, all images are single  
937 optical sections from the z-stack confocal series. (A) and (B) are 3D reconstructions from a z-stack  
938 confocal series. All scale bars, 20  $\mu$ m.

939

940 **Figure 6. The differences between epithelial structure in ectoderm and endomesoderm in *N.***  
941 ***vectensis* embryos are due to the lack of mechanisms to segregate a distinct mesoderm.**

942 (A) Diagram depicting key cellular and molecular mechanisms involved during gastrulation of  
943 bilaterian and *N. vectensis* (a cnidarian) embryos. See also Figure S8.

944

945

946 **Supplemental Information**

947

948 **Figure S1. Related to Figure 1. Epidermal and gastrodermal cells are joined by different set**  
949 **of junctional complexes.**

950 (A) TEM micrographs of *N. vectensis* primary polyps. Epidermal cells (ectodermally derived) are  
951 joined most likely by AJs (Red arrowheads). Gastrodermal cells (endomesodermally derived)  
952 are interconnected by fewer and shorter contacts, most likely by septate junctions (yellow  
953 arrowheads). a and b: two different types of epidermal cells. Note the ectodermally-derived  
954 cnidocyte in b. c and d: two different types of gastrodermal cells. b' and d' are high  
955 magnification images from boxed region in b and d, respectively. gc: gastric cavity. Scale bars  
956 in a, b, c, and d: 500 nm. Scale bars in b' and d': 200 nm.

957 (B) *In vivo* localization of *Nvβ-catenin::GFP* after 36 hpf in *N. vectensis* embryos. Arrowheads  
958 indicate the cortical localization of *Nvβ-catenin::GFP* (AJs) in the ectoderm that was not  
959 observed in the endomesoderm. High magnification image from boxed region is shown on the  
960 right. Scale bars: 20 μm.

961 (C) Immunofluorescent staining for *NvPar-6* and *NvPar-1* (red) at late planula and polyp stages  
962 show that both Par proteins are absented from the endomesoderm. Phalloidin is shown in gray.  
963 Histone and tubulin antibody staining are shown in Figure 1B and 1C as counterstain to show  
964 the penetrability in the fixed tissue. Scale bars: 20 μm.

965

966 **Figure S2. Related to Figure 2 and 3. Disruption of the aPKC/Par complex in *N. vectensis***  
967 **embryos.**

968 (A) Diagram depicting the modifications made to *NvPar-1*, *NvPar-6*, and *NvPar-3* sequence to  
969 generate the dominant negative version of each protein (dn*NvPar-1*, dn*NvPar-6*, and dn*NvPar-*  
970 *3*, respectively), which lack the putative interaction domain with *NvaPKC*. In the right, a  
971 diagram depicts the localization of *NvPar-1*, *NvaPKC*, *NvPar-6*, and *NvPar-3* proteins in  
972 epithelial cells. The putative interaction with *NvaPKC*, restricts the localization of *NvPar-6* and  
973 *NvPar-3* strictly to the apical cortex of the cell, and *NvPar-1* to the lateral cortex of the cell. See  
974 also Figure S3.

975 (B) Immunofluorescent staining for Tubulin and Phalloidin at gastrula stage of embryos expressing



976 dn*NvPar-6*, and dn*NvPar-3*. The overexpression of either dn*NvPar-6::mVenus* or dn*NvPar-*  
977 *3::mVenus* induced phenotypes where the endomesodermal cells (yellow arrows) are  
978 disorganized during gastrulation. We observed a disorganized endoderm formed by 1) cells  
979 with fibroblast-like morphologies, 2) stellate shaped mesenchymal-like cells, or 3) a mass of  
980 round dead cells. Cell morphotypes are outlined in red and their schematic representation is  
981 presented below them. The penetrance of the obtained phenotypes when either dn*NvPar-*  
982 *6::mVenus* (blue) or dn*NvPar-3::mVenus* (magenta) are overexpressed is indicated for each  
983 case.

984 (C) Immunofluorescent staining for Tubulin and Phalloidin at polyp stage of embryos expressing  
985 dn*NvPar-6*, and dn*NvPar-3*. We observed 'Endoderm-less' polyps from phenotype 3: absence  
986 of an organized endoderm, tentacles or complete mesenteries in injected animals that survived  
987 to this stage (2 weeks post fertilization). A recognizable ectodermal pharynx (yellow  
988 arrowheads) was detected in some of these polyps.

989 (D) The position of the sgRNAs (red) and primers (green) used for the PCR assay are shown on  
990 the diagram depicting the genomic sequence of *Nvpar-6*. Note the absence of fragments of  
991 *Nvpar-6* (arrow) resulting from CRISPR/Cas9 mediated mutagenesis. The presence of other  
992 bands suggests mosaicism. Black rectangles correspond to *Nvpar-6* exon. PF: primer forward.  
993 PF: primer reverse.

994 (E) The position of the sgRNAs (red) and primers (green) used for the PCR assay are shown on  
995 the diagram depicting the genomic sequence of *Nvpar-3*. Note the absence/truncation of  
996 fragments of *Nvpar-3* (arrow) resulting from CRISPR/Cas9 mediated mutagenesis. The  
997 presence of other bands suggests mosaicism as shown in Figure S3E. Blue rectangles  
998 correspond to *Nvpar-3* exon. PF: primer forward. PF: primer reverse.

999

1000 **Figure S3. Related to Figure 3. CRISPR/Cas9 mediated mutagenesis of *Nvpar-3*.** Morphology  
1001 is shown by DAPI, Tubulin, and Phalloidin staining. \*: site of gastrulation is up.

1002 (A) Different ectodermal thickness (yellow) observed in CRISPR/Cas9 mutants. Control and  
1003 affected (thick and thin) epithelia were aligned at the base of the ectoderm (red line) for better  
1004 visualization.



1005 (B) Immunofluorescent staining for cytoskeleton and *NvPar-6* in CRISPR/Cas9 *Nvpar-6* knock-out  
1006 embryos (mosaic phenotype). Arrowheads indicate the absence of *NvPar-6*. High magnification  
1007 images are shown on the right. The cytoskeleton is apically organized only where *NvPar-6* is  
1008 apically localized.

1009 (C) Diagram depicts the role of aPKC/Par complex (green) on cytoskeleton.

1010 (D) Immunofluorescent staining for  $\beta$ -catenin ( $\beta$ -cat) in single injected-blastomere control and  
1011 CRISPR/Cas9 *Nvpar-3* knock-outs at 40 hpf. Streptavidin-Biotin TxRed Dextran (Dex) is shown  
1012 in green. Arrowheads indicate the absence of the protein and disrupted epithelium. Arrows  
1013 indicate bottle-like shape cells. Note the displacement of nuclei (yellow arrow) and changes in  
1014 tubulin (Tub) staining.

1015 (E) *In situ* hybridization of *Nvpar-3* knockout embryos (Cas9 and gRNAs) compared with control  
1016 embryos at 40 hpf. The disruption of the *N. vectensis* Par/aPKC complex modified the  
1017 morphology but did not modify the cell-fate specification of endomesodermal cells. Lower panel  
1018 for *Nvfz-10* may represent an extreme case of mesenchymal-like endomesoderm.

1019

1020 **Figure S4. Related to Figure 3 and S2. *In vivo* localization of dn*NvPar-6* and dn*NvPar-3***  
1021 **proteins at different embryonic stages.**

1022 Images of the whole embryo correspond to a 3D reconstruction from a z-stack series. Side panels  
1023 are a single optical section from the z-stack series. An aboral view is shown for all gastrula stages.  
1024 Yellow arrows indicate the apico-lateral cortex labeled with Lifeact::mTq2. Scale bars: 10 $\mu$ m.

1025 (A) *In vivo* localization of *NvPar-6*::mVenus and dn*NvPar-6*::mVenus at cleavage, blastula, and  
1026 gastrula stages. *NvPar-6*::mVenus distributes uniformly at the apical region of the cell but  
1027 displays a scattered pattern. However, dn*NvPar-6*::mVenus displays stronger cortical  
1028 localization due to its interaction with *NvCdc42* at the apical and apico-lateral cortex of the  
1029 cells. This was confirmed by their co-expression with *NvCdc42*::mCherry. White arrowheads  
1030 indicate the scattered localization of *NvPar-6*::mVenus. White arrows indicate the cortical and  
1031 stronger localization of dn*NvPar-6*::mVenus.

1032 (B) *In vivo* localization of Lifeact::mTq2 in *NvPar-6*::mVenus and dn*NvPar-6*::mVenus expressing  
1033 embryos shown in (A) at cleavage, blastula, and gastrula stages. The actin cytoskeleton was

- 1034 also affected by the overexpression of dnNvPar-6::mVenus.
- 1035 (C) *In vivo* co-distribution of NvCdc42::mCherry with NvPar-6::mVenus at blastula and gastrula  
1036 stages.
- 1037 (D) *In vivo* co-distribution of NvCdc42::mCherry with dnNvPar-6::mVenus at blastula and gastrula  
1038 stages. NvCdc42::mCherry localization is also affected when dnNvPar-6::mVenus is  
1039 overexpressed.
- 1040 (E) Graphical summary of the observed results for NvPar-6::mVenus and dnNvPar-6::mVenus.
- 1041 (F) *In vivo* localization of NvPar-3::mVenus and dnNvPar-3::mVenus at cleavage, blastula, and  
1042 gastrula stages. dnNvPar-3 displays broader localization, resembling the localization of NvPar-  
1043 6 and indicating its release from AJs (compare with NvPar-3). White arrowheads indicate the  
1044 punctate localization of NvPar-3::mVenus. White arrows indicate the broader localization of  
1045 dnNvPar-3::mVenus.
- 1046 (G) *In vivo* localization of Lifeact::mTq2 in NvPar-3::mVenus and dnNvPar-3::mVenus expressing  
1047 embryos shown in (F) at cleavage, blastula, and gastrula stages. The actin cytoskeleton was  
1048 also affected by the overexpression of dnNvPar-3::mVenus.
- 1049 (H) *In vivo* co-distribution of NvCdc42::mCherry with NvPar-3::mVenus at blastula and gastrula  
1050 stages.
- 1051 (I) *In vivo* co-distribution of NvCdc42::mCherry with dnNvPar-3::mVenus at blastula and gastrula  
1052 stages. NvCdc42::mCherry localization is not affected when dnNvPar-3::mVenus is  
1053 overexpressed.
- 1054 (J) Graphical summary of the observed results for NvPar-3::mVenus and dnNvPar-3::mVenus.  
1055
- 1056 **Figure S5. Apical junctions are regulated by GSK-3 $\beta$  in epithelial cells during gastrulation in**  
1057 ***N. vectensis* embryos.**
- 1058 (A) IFS for NvPar-6 in AZ-treated embryos.
- 1059 (B) IFS for  $\beta$ -catenin in AZ-treated embryos.
- 1060 (C) IFS for NvPar-1 in AZ-treated embryos.
- 1061 (D) Graphical summary of the observed results.

1062 Par-6,  $\beta$ -catenin, and Par-1 were detected at the apical cortex (arrowheads) of the  
1063 endomesodermal epithelium of AZ-treated embryos, but not in control embryos. Arrows indicated  
1064 the stabilization of microtubules at the apical cortex of endomesodermal cells. Two distinct  
1065 phenotypes were observed after AZ treatment: (a') gastrulation without elongation 27% (27/100),  
1066 (b') no invagination of the endomesoderm 13% (13/100).

1067

1068 **Figure S6. Related to Figure 5. *Nvsnail-A* and *Nvsnail-B* together regulate AJs.**

1069 \*site of gastrulation.

1070 (A) Immunofluorescent staining of embryos at 40 hpf where *NvSnail-A::mCherry* and *NvSnail-*  
1071 *B::mCherry* mRNA were overexpressed together into a single blastomere lineage (followed by  
1072 green Streptavidin-TxRed Dextran (Dex). No affects were observed in approximately 1/8 of the  
1073 injected embryos. Arrowheads indicate the disrupted epithelium. Arrows indicate bottle-like  
1074 shape cells.

1075 (B) Embryo wide CRISPR/Cas9 knock-out for both *Nvsnail-A* and *Nvsnail-B* at 40 hpf showing  
1076 embryos that did not gastrulate and retain  $\beta$ -catenin ( $\beta$ -cat) and *NvaPKC* at the apical cell-  
1077 cortex of the endomesodermal plate (arrowheads).

1078 (C) Embryo wide CRISPR/Cas9 knock-out for both *Nvsnail-A* and *Nvsnail-B* at 40 hpf showing  
1079 embryos that developed a pharynx (arrow) but not an organized endomesoderm.

1080 (D) Embryo wide CRISPR/Cas9 knock-out for both *Nvsnail-A* and *Nvsnail-B* at 2 weeks hpf  
1081 showing embryos that did not developed a gastrodermal epithelium.

1082

1083 **Figure S7. Related to Figure 5. CRISPR/Cas9 mediated mutagenesis of *Nvsnail-A* and**  
1084 ***Nvsnail-B*.**

1085 (A) The position of the sgRNAs (red) and primers (green) used for the PCR assay are shown on  
1086 the diagram depicting the genomic sequence of *Nvsnail-A*. Note the absence of fragments of  
1087 *Nvsnail-A* (arrow) resulting from CRISPR/Cas9 mediated mutagenesis. The presence of other  
1088 bands suggests mosaicism. Black rectangles correspond to *Nvsnail-A* exon. Blue double arrow  
1089 depicts UTR regions. PF: primer forward. PF: primer reverse.

1090 (B) The position of the sgRNAs (red) and primers (green) used for the PCR assay are shown on

1091 the diagram depicting the genomic sequence of *Nvsnail-B*. Note the absence of fragments of  
1092 *Nvsnail-B* (arrow) resulting from CRISPR/Cas9 mediated mutagenesis. The presence of other  
1093 bands suggests mosaicism as shown in (C). Black rectangles correspond to *Nvsnail-B* exon.  
1094 Blue double arrow depicts UTR regions. PF: primer forward. PF: primer reverse.

1095 (C) *In situ* hybridization of *Nvsnail-A+Nvsnail-B* knockout embryos (Cas9 and gRNAs) compared  
1096 with control embryos at 40 hpf. *Nvsnail-A+Nvsnail-B* knockout embryos display no expression  
1097 and mosaic expression of *Nvsnail-A* and *Nvsnail-B* but did not modify the cell-fate specification  
1098 of ectodermal cells.

1099

1100 **Figure S8. Related to Figure 6. Suggested model for mesoderm specification in Metazoa.**

1101 (A) Differential regulation of cell adhesion by the endomesoderm GRN is mediated by changes in  
1102 cell polarity that regulate  $\beta$ -catenin localization. These mechanisms emerged at the Bilateria +  
1103 Cnidaria node.

1104 (B) Ctenophores do not possess a full complement of cell adhesion, cell-polarity, and  
1105 endomesodermal GRN components present in the most common ancestor between Cnidaria  
1106 and Bilateria. However, ctenophores possess a distinct mesoderm, suggesting the emergence  
1107 of different mechanisms to segregate mesoderm in Metazoa.

1108

1109

1110 **Movie S1. Related to Figure 4. EMT-like process occurs in *dnNvPar-3::mVenus* expressing**  
1111 **cells.** Lifeact::mTq2 is shown in grey. Arrows indicate the apical constriction of detaching cells.

1112 Scale bars:10 $\mu$ m



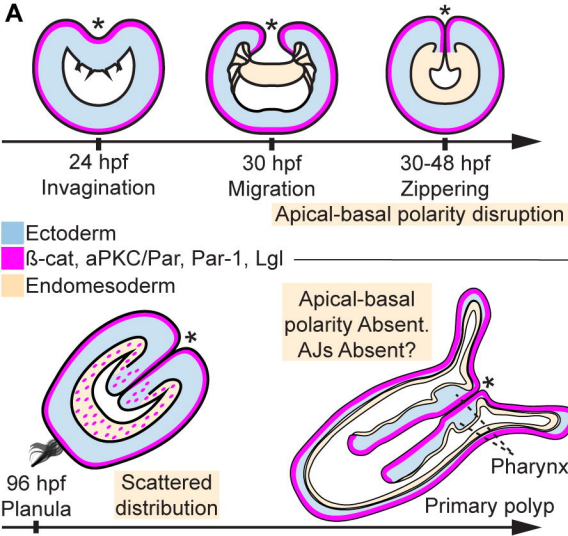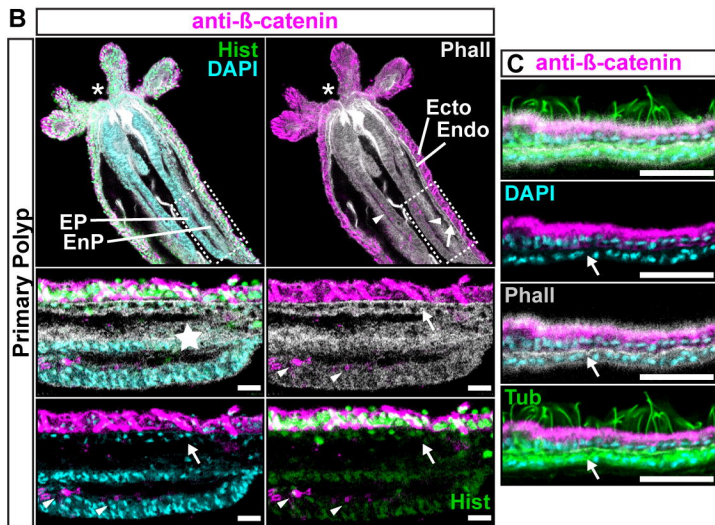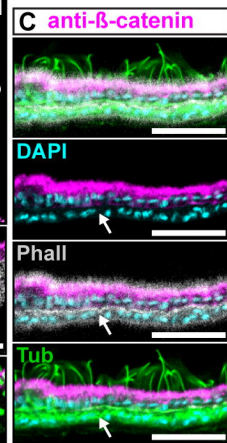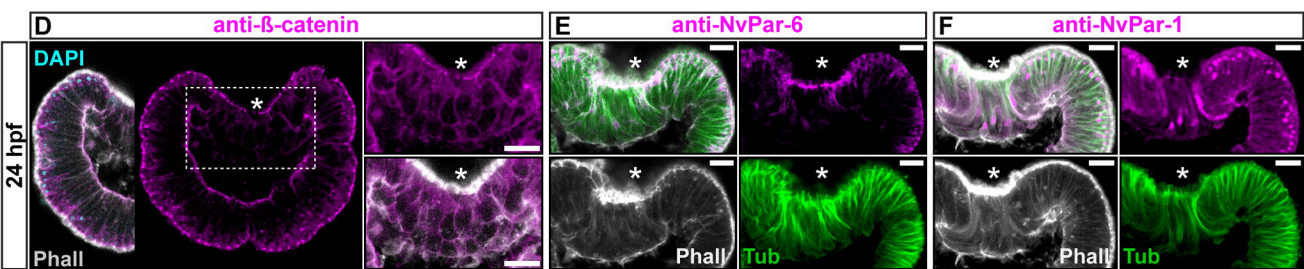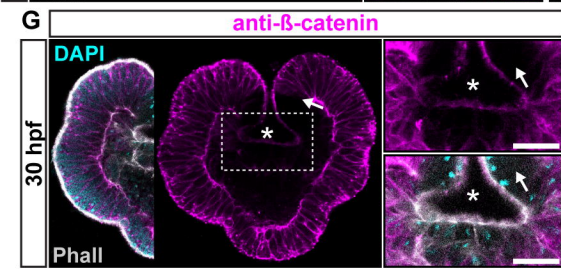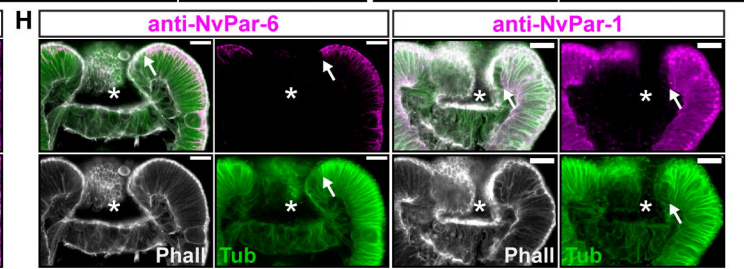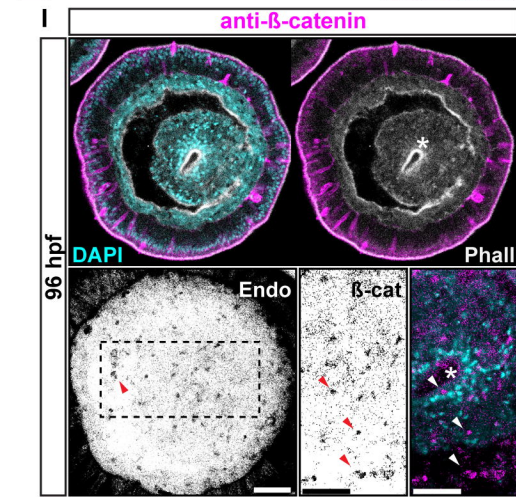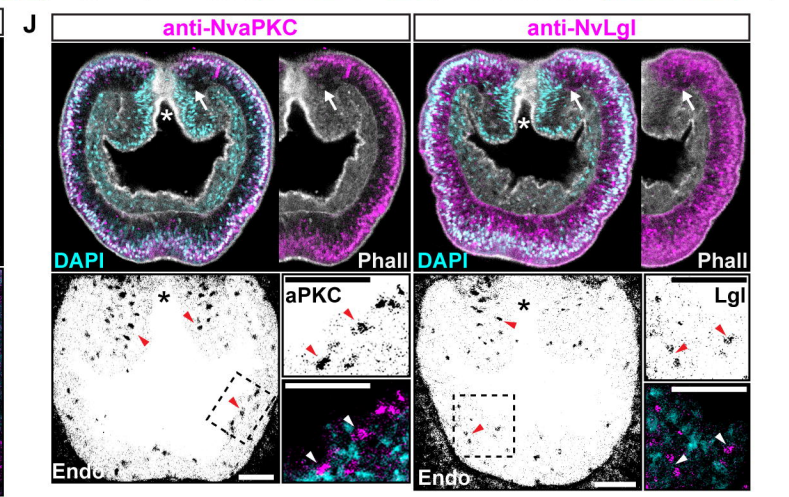





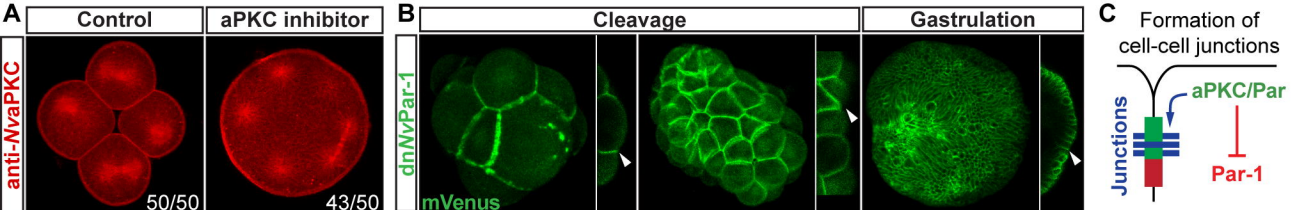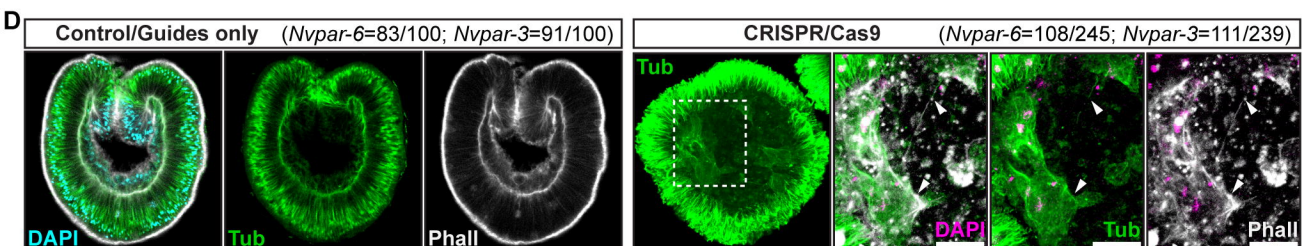

**E** Trans-epithelial interaction  
Ectodermal apical-basal cell-polarity regulates epithelial integrity

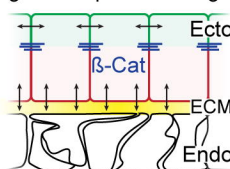

No aPKC/Par complex in endomesoderm = No effect

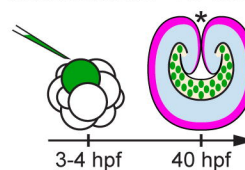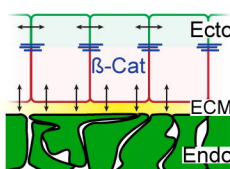

No aPKC/Par complex in ectoderm = Disruption of epithelial integrity

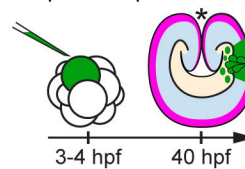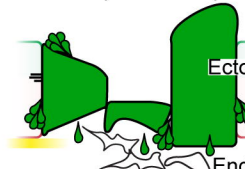

**F** Single blastomere injection CRISPR/Cas9 Nvpar-3

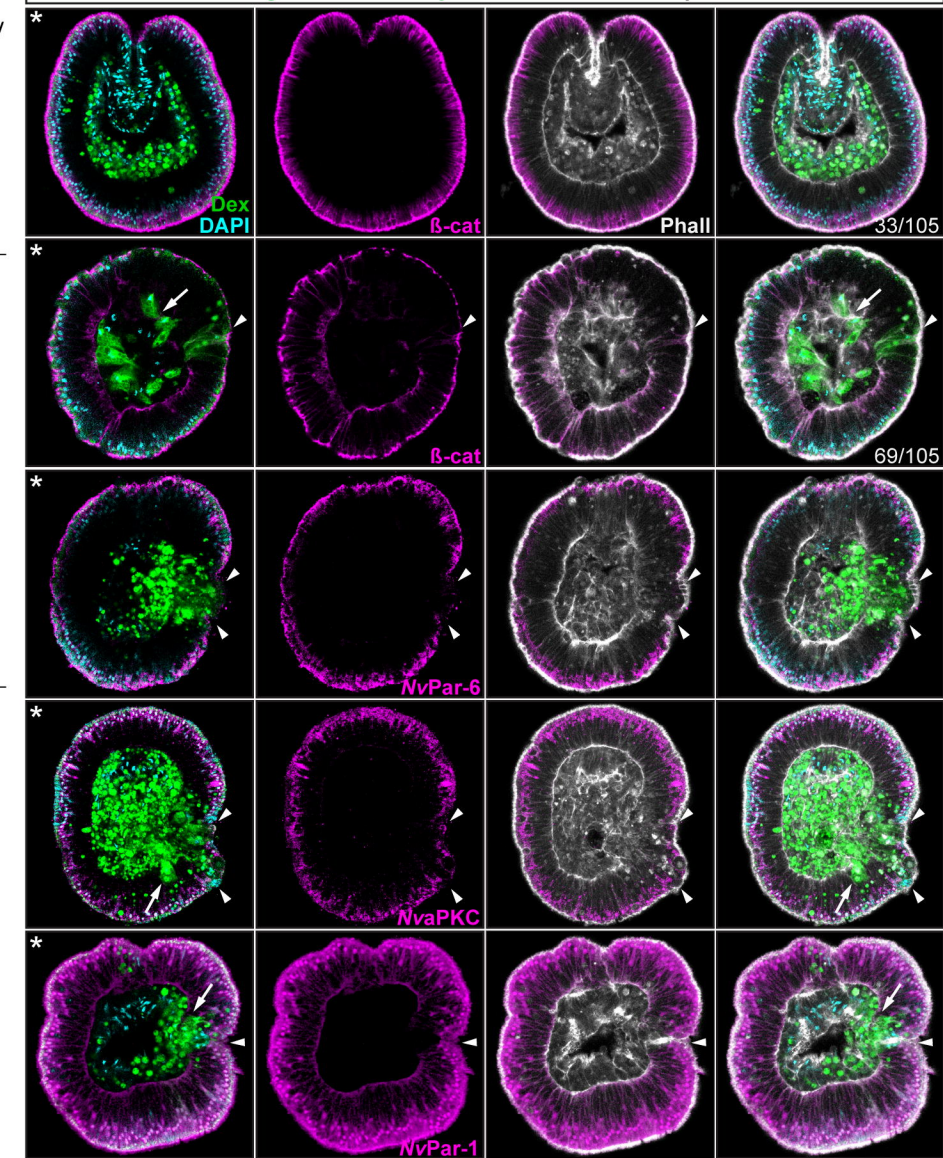



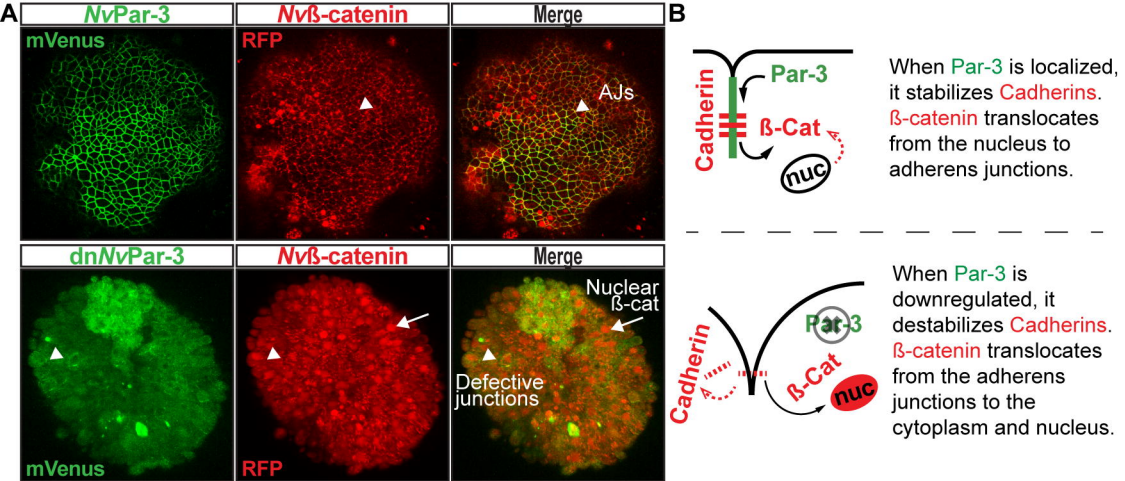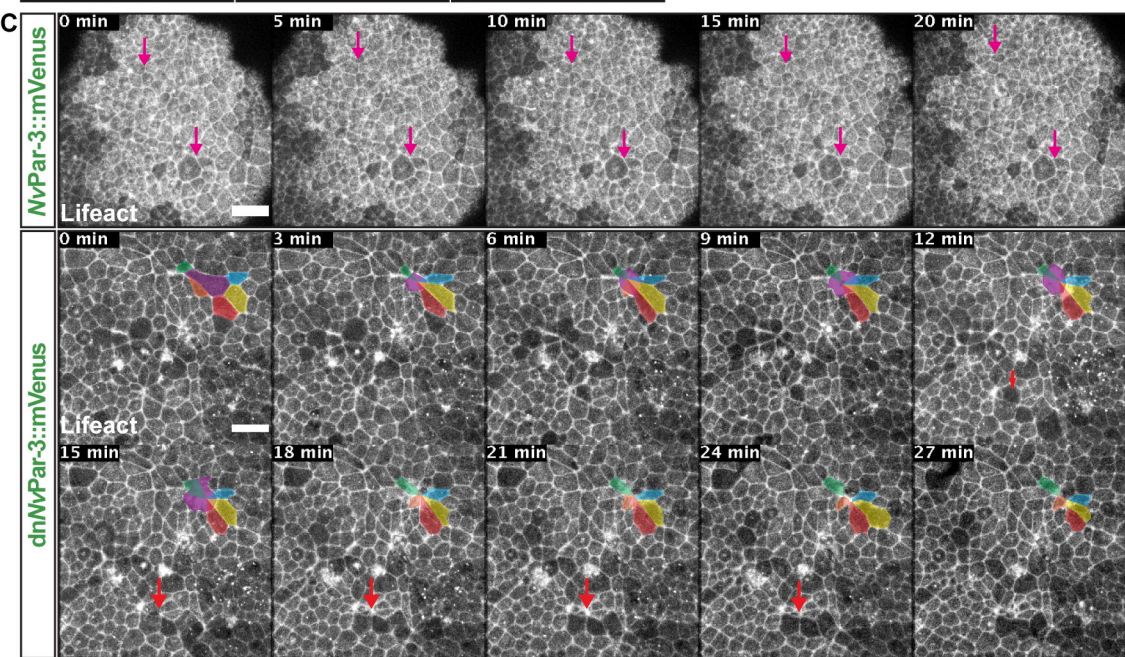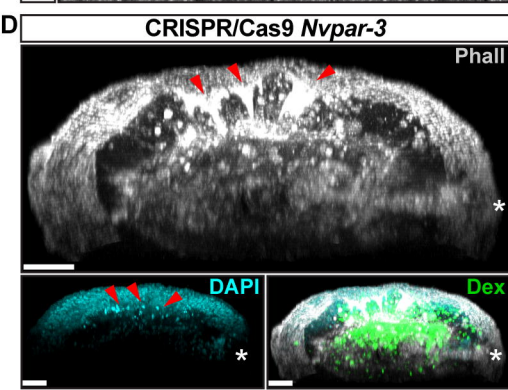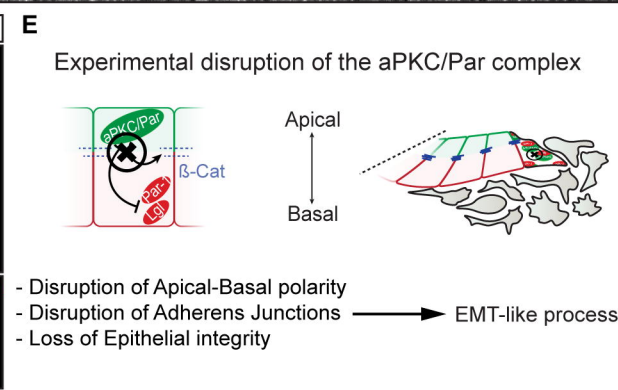



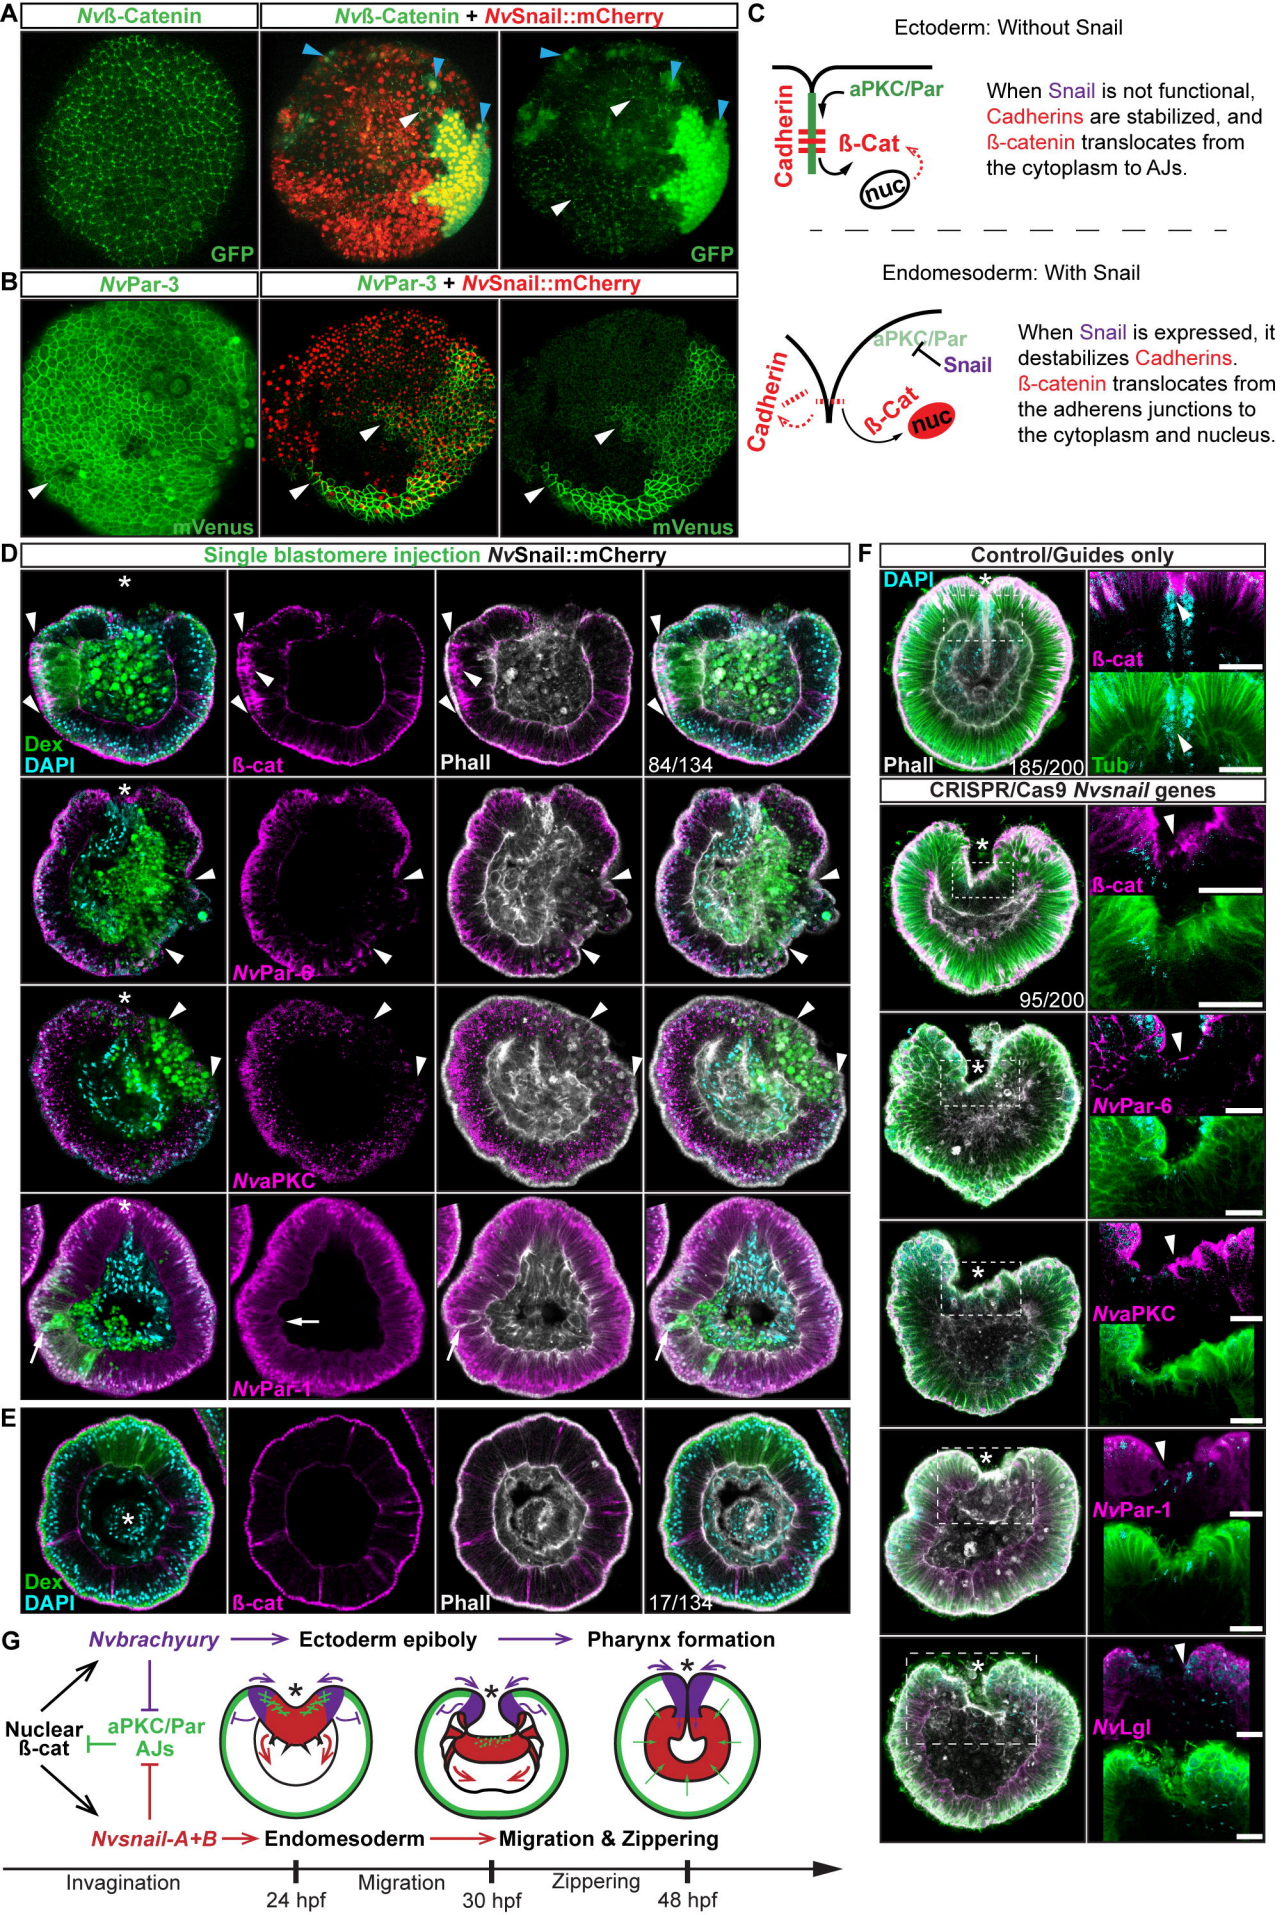

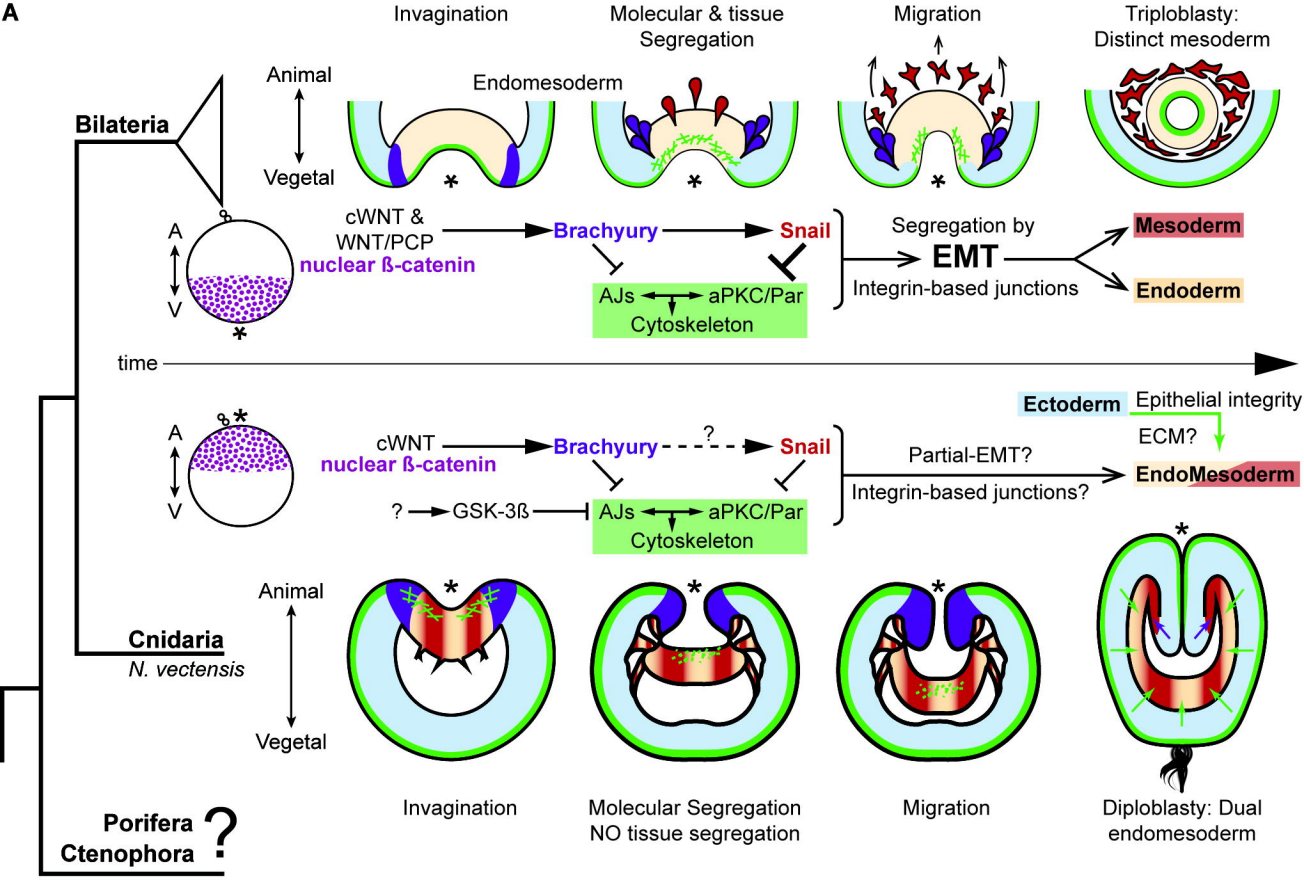

Source: https://www.biorxiv.org/content/10.1101/235267v2.full.pdf
